# Theory of radiologist interaction with instant messaging decision support tools: a sequential-explanatory study

John Lee Burns <sup>1,2,\*</sup>, Judy Wawira Gichoya<sup>3</sup>, Marc D Kohli<sup>4</sup>, Josette Jones<sup>2</sup>, Saptarshi Purkayastha<sup>2</sup>

1 <sup>1</sup> Department of Radiology & Imaging Sciences, Indiana University School of Medicine, Indianapolis, IN, United States of  
2 America

3 <sup>2</sup> Department of BioHealth Informatics, Indiana University Luddy School of Informatics, Computing, and Engineering,  
4 Indianapolis, IN, United States of America

5 <sup>3</sup> Department of Radiology and Imaging Sciences, Emory University School of Medicine, Atlanta, Georgia, United States of  
6 America

7 <sup>4</sup> Department of Radiology and Biomedical Imaging, University of California San Francisco, San Francisco, California, United  
8 States of America

9 \* Corresponding author

10 Email: [jolburns@iu.edu](mailto:jolburns@iu.edu) (A1)

11

## 12 **Abstract**

13 Radiology specific clinical decision support systems (CDSS) and artificial intelligence are poorly integrated into the radiologist  
14 workflow. Current research and development efforts of radiology CDSS focus on 5 main interventions, based around exam  
15 centric time points– at time of radiology exam ordering, after image acquisition, intra-report support, post-report analysis, and  
16 radiology workflow adjacent. We review the literature surrounding CDSS tools in these time points, requirements for CDSS  
17 workflow augmentation, and technologies that support clinician to computer workflow augmentation.

18 We develop a theory of radiologist-decision tool interaction using a sequential explanatory study design. The study consists  
19 of 2 phases, the first a quantitative survey and the second a qualitative interview study. The phase 1 survey identifies  
20 differences between average users and radiologist users in software interventions using the User Acceptance of Information  
21 Technology: Toward a Unified View (UTAUT) framework. Phase 2 semi-structured interviews provide narratives on why  
22 these differences are found. To build this theory, we propose a novel solution called Radibot - a conversational agent capable  
23 of engaging clinicians with CDSS as an assistant using existing instant messaging systems supporting hospital  
24 communications. This work contributes an understanding of how radiologist-users differ from the average user and can be  
25 utilized by software developers to increase satisfaction of CDSS tools within radiology.

## 26 **Author Summary**

27 There is a need for human-machine interfaces between radiologists and clinical decision support systems (CDSS). Within the  
28 variety of systems radiologists interact with, there is no best fit for CDSS presented in the literature. After reviewing current  
29 literature surrounding CDSS use in healthcare and radiology, we propose a novel solution - a conversational agent capable of  
30 engaging clinicians as a team member using existing instant messaging systems supporting hospital communications.

31 We test the acceptance of this intervention using the User Acceptance of Information Technology: Toward a Unified View  
32 (UTAUT) framework in survey and interview formats. Within our sample group, we found that radiologists have a high  
33 intent to use and a positive attitude towards this intervention. Our sample of radiologists deviated from the standard user  
34 UTAUT expects, suggesting that radiologist’s acceptance of software tools differs from the standard user. This work builds a  
35 theory of radiologist-decision support tool interaction that may be useful for software developers and systems integrators.

## 36 **1 Introduction**

37 Radiology domain-specific clinical decision support systems (CDSS) applications are poorly integrated into the  
38 radiologist workflow (1). In 2017, Dreyer and Geis described a transition in radiology moving towards integrating Artificial  
39 Intelligence (AI) into the radiologist workflow. "In the past, radiology was reinvented as a fully digital domain when new tools,  
40 PACS and digital modalities, were combined with new workflows and environments that took advantage of the tools. Similarly,  
41 a new cognitive radiology domain will appear when AI tools combine with new human-plus-computer workflows and  
42 environments." They describe the concept of a "Centaur Radiologist" as a physician utilizing AI-augmented CDSS workflows  
43 to increase efficiency (2). We expand this term as "future radiologist," inclusive of non-AI techniques in CDSS.

44 However, the future radiologist will not happen if the tools are poorly integrated, with cumbersome human-computer interfaces  
45 (3). Deliberate and sustained effort by using inter-disciplinary knowledge from human-centered computing, psychology,  
46 cognitive sciences, and medicine is required to build CDSS for the future radiologist (4). In this work we create a basis of  
47 knowledge in the theory of radiologist-decision tool interaction using a sequential explanatory study design. The study consists  
48 of 2 phases, the first a quantitative survey and the second a qualitative interview study. The phase 1 survey identifies differences  
49 between average users and radiologist users in software interventions using the User Acceptance of Information Technology:  
50 Toward a Unified View (UTAUT) framework (5). Phase 2 semi-structured interviews provide narratives on why these  
51 differences are found. To build this theory, we propose a novel solution called *Radibot* - a conversational agent (CA) capable  
52 of engaging clinicians with CDSS as an assistant using existing instant messaging (IM) systems supporting hospital  
53 communications. This work contributes an understanding of how radiologist-users differ from the average user and can be  
54 utilized by software developers to increase satisfaction of CDSS tools within radiology.

### 55 **1.1 Background**

56 We expect that the future radiologist will routinely interact with CDSS at each stage of their workflow. We designed  
57 Radibot for diagnostic radiologists, with interventions at each of the following time-points: after image acquisition, during  
58 report creation, after report creation, and between studies. A brief overview of existing interventions in each time point follows.

- 59 • After Image Acquisition - radiologists combine a variety of data to make interpretations of images. Interventions  
60 include Computer-Aided Detection (CAD), Computer-Aided Diagnosis (CADx), and patient history/metadata

61 presentation. These interventions generally function within the Picture Archiving and Communication System  
62 (PACS), though some will interface with the Radiology Information System (RIS), Voice Recognition system (VR),  
63 or in an external client (6-16).

64 • During Report Creation – these interventions surround embedding evidence-based guideline processes during  
65 dictation and are found within VR. Guidelines are navigated using drill-through commands or natural language  
66 processing (NLP) of the dictation to generate report text (17, 18).

67 • After Report Creation - In most RIS, reports are stored as unstructured text. Interventions in post-report analysis  
68 include extracting categorical data, automating radiologist-clinician communication, and quality improvement  
69 systems. By generating summative report metadata, these interventions enable context-switching and reduce fatigue  
70 when a radiologist is asked to return to a finished report (19-31).

71 • Between Studies – existing adjacent to radiologist workflow, these interventions influence decision making at an  
72 individual or business level and consist of workflow-prioritization, management, and feedback tools. These tools  
73 utilize metadata found in Health Level 7 (HL7) or Digital Imaging and Communications in Medicine (DICOM)  
74 messages. Users interface with them outside of clinical systems, IE. web dashboards, or they are integrated into  
75 PACS/RIS/VR presentation layers (32-39).

76 Diagnostic radiologist's clinical work is fully completed using systems, including PACS, RIS, and VR, with every interaction  
77 being digitally augmented (40). Given the fully digital clinical workflows, radiology specific CDSS implementations are  
78 uniquely positioned to provide support and affect change. Radiology specific guidelines for "advisor systems" were laid out  
79 by Teather et al. in 1985, while Khorasani in 2006 provides features for the development of clinical decision support systems  
80 (41, 42). Outside of radiology, CDSS are built following the Ten Commandments for Effective Clinical Decision Support:  
81 Making the Practice of Evidence-Based Medicine a Reality (43). Commandments 2, 3, 7, 10, and 1 – anticipate needs, fit into  
82 user workflow, simple interventions, knowledge system maintenance, and speed – appear with a higher frequency when  
83 aligned with radiology specific guidance. An alignment of the general CDSS and radiology specific CDSS guidelines are  
84 found in table 1. Differences in CDSS priorities underscore the need for more research in this area and are mapped to  
85 UTAUT concepts and the hypotheses for phase 1.

**Table 1 Commandments compared to published considerations.**

| Commandments <sup>a</sup> /Considerations                                                                                                                                                                                                    | Speed is Everything | Anticipate Needs and Deliver in Real Time | Fit Into the Users Workflow | Little Things Can Make a Big Difference | Recognize that Physicians Will Strongly Resist Stopping | Changing Direction is Easier than Stopping | Simple Interventions Work Best | Ask for Additional Information Only When You Really Need It | Monitor Impact, Get Feedback, and Respond | Manage and Maintain Your Knowledge-Based Systems |
|----------------------------------------------------------------------------------------------------------------------------------------------------------------------------------------------------------------------------------------------|---------------------|-------------------------------------------|-----------------------------|-----------------------------------------|---------------------------------------------------------|--------------------------------------------|--------------------------------|-------------------------------------------------------------|-------------------------------------------|--------------------------------------------------|
| "The system must follow the usual working practices of the clinician and must not appear to usurp his/her position." <sup>b</sup>                                                                                                            |                     |                                           | X                           |                                         | X                                                       |                                            |                                |                                                             |                                           |                                                  |
| "The system must have a good, adaptable user interface which uses clinical terminology, and is able to give help on demand." <sup>b</sup>                                                                                                    | X                   | X                                         | X                           |                                         |                                                         |                                            | X                              |                                                             |                                           |                                                  |
| "Diagnostic advice (if sought) must be 'calibrated' so that uncertainties output by the system may be interpreted in terms of the incidence of errors. Explanation/justification of conclusions should be available on demand." <sup>b</sup> |                     | X                                         |                             |                                         |                                                         |                                            |                                | X                                                           |                                           | X                                                |
| "For the system to be used, rather than just usable, it must offer more than just simple diagnostic advice, and these other facilities should be available independently of diagnostic advice." <sup>b</sup>                                 |                     | X                                         | X                           |                                         |                                                         |                                            |                                |                                                             |                                           | X                                                |
| Time sensitivity, with a preference for real time CDSS. <sup>c</sup>                                                                                                                                                                         | X                   | X                                         |                             |                                         |                                                         |                                            |                                |                                                             |                                           |                                                  |
| Brevity in providing salient information to answer the clinical question asked and link to evidence. <sup>c</sup>                                                                                                                            |                     |                                           | X                           | X                                       |                                                         |                                            | X                              |                                                             |                                           |                                                  |
| Recommend action and provide descriptive reasoning and actionable interventions <sup>c</sup>                                                                                                                                                 |                     |                                           |                             |                                         |                                                         | X                                          | X                              |                                                             |                                           |                                                  |
| CDSS must use up to date evidence-based medicine <sup>c</sup>                                                                                                                                                                                |                     |                                           |                             |                                         |                                                         |                                            |                                |                                                             |                                           | X                                                |
| CDSS should improve productivity, efficiency, quality, and safety. <sup>c</sup>                                                                                                                                                              |                     |                                           |                             |                                         |                                                         |                                            |                                |                                                             | X                                         |                                                  |

<sup>a</sup> 10 commandments from Bates et al. (43).

<sup>b</sup> Considerations quoted from Teather et al. (41)

<sup>c</sup> Considerations paraphrased from Khorasani (42),

## 86 1.2 Instant Messaging and Conversational Agents in Healthcare

87 IM is found throughout the healthcare enterprise, including in disease management, patient-clinician interactions,  
 88 medical education, among patient populations and workforce members for extra-clinical activities. IM can be inclusive of  
 89 voice, video calling, and file sharing (44). Extra-clinically, IM tools facilitate socialization, catharsis, and professional  
 90 connectiveness functionalities when applied in clinical settings (45, 46). IM is asynchronous and short-form, leading to  
 91 advantages over other communication methods, particularly in the area of articulation work - answering medical questions,  
 92 coordinating logistics, addressing social information for patients, and querying staff/equipment locations or status (47). IM is  
 93 integrated into many PACS, RIS, and VR, serving many purposes within radiology including care discussions and facilitating  
 94 remote tele-radiology communications (29, 48-58).

95 CA, or chatbots, are natural language human-machine interfaces. CA can apply 4 methods for negotiating user  
 96 interactions: immediate, negotiated, mediated, and scheduled (59). Consumer health care CA are currently scheduling  
 97 appointments, providing basic symptom identification and recommendation, and assisting with long term care such as sensor  
 98 monitoring/alerting and medication reminders (60). Most healthcare CA are built for patients (interview, data collection, or

99 telemonitoring), while clinician focused CA are designed around data collection (61). Other efforts in clinician focused CA  
100 include interpreting spoken language into clinical facts and drug interaction/alternative drug recommendation systems (62-64).  
101 IM impact on task completion is not fully understood, especially in the context of automated IM interventions. There is evidence  
102 that non-relevant messages can increase or reduce task completion times depending on the message initiator; at a cost of quality  
103 of the task output (65). Disruptiveness of IM specific interventions is reduced when IM are relevant to the task being completed  
104 or if delivered at time-points that fit the users workflow (66). IM interactions among a professional workforce are found to  
105 support task completion, accuracy, and quality of outcomes (65).

## 106 **2 Methods**

### 107 **2.1 Population**

108 Our study population consists of 2 sets of radiologists – attendings and trainees at a large academic health system. The  
109 attendings set is a subset of the approximately 112 radiologist faculty at a teaching hospital system. The trainee’s set is a subset  
110 of the 62 residents/fellows within the same system. Our population is acquired through convenience sampling. Of 174 possible  
111 participants, 98 responded affirmative that they would complete the survey and 3 that they did not want to participate. 39  
112 participants responded that they would complete an interview and 11 responded that they would participate in the survey but  
113 not the interview. In total, 94 surveys were submitted, and 23 interviews were conducted.

### 114 **2.2 Survey**

115 An electronic survey was created using Qualtrics (67), we collect population composition and quantitative data  
116 surrounding intervention feasibility, usability, and acceptance. Within the UTAUT framework we focused on behavioral  
117 intention to use the system (BI), attitude toward using the technology (AF), effort expectancy (EOU), performance expectancy  
118 (PE) and anxiety (ANX). We chose to not utilize questions in social influence, facilitating conditions, and self-efficacy due to  
119 applicability to a prospective study of a tool not yet implemented in practice. A full listing of UTAUT questions by construct  
120 and factor are found on EDUTECH’s Wiki (68). Due to respondent time constraints we chose to utilize 12 of 19 questions in  
121 the chosen constructs, with each construct having at least 2 questions asked. Questions were eliminated if they were not relevant  
122 to a system that does not yet exist (Example: Working with the system is fun).

123 Other frameworks exist for testing usability and user experience for software design. However, UTAUT is unique in the  
124 number of constructs it can capture quickly. Measures like the System Usability Scale or Technology Acceptance Model can  
125 capture intent to use, but do not create the linkages to moderating factors of interest. Contrasting the UTAUT concepts with  
126 the CDSS commandments, we create the following links:

- 127 • Performance Expectancy
  - 128 ○ 1. Speed is everything
  - 129 ○ 2. Anticipate Needs and Deliver in Real Time
  - 130 ○ 5. Recognize that physicians will strongly resist stopping
  - 131 ○ 7. Simple interventions work best
- 132 • Effort Expectancy
  - 133 ○ 3. Fit into the user's workflow
  - 134 ○ 4. Little things can make a big difference
  - 135 ○ 6. Changing Direction is Easier than Stopping
  - 136 ○ 8. Ask for Additional Information Only When You Really Need It
- 137 • Anxiety
  - 138 ○ 5. Recognize that physicians will strongly resist stopping

139 The survey in full is included in the S1 Appendix A.1. Fig 1 highlights the intervention and proposed capabilities.

After completing the draft report, you receive an IM notification. The notification's appearance is shown below as the orange highlight surrounding the IM tool on a PACS workstation. This conversation initiates two seconds after saving the draft report.

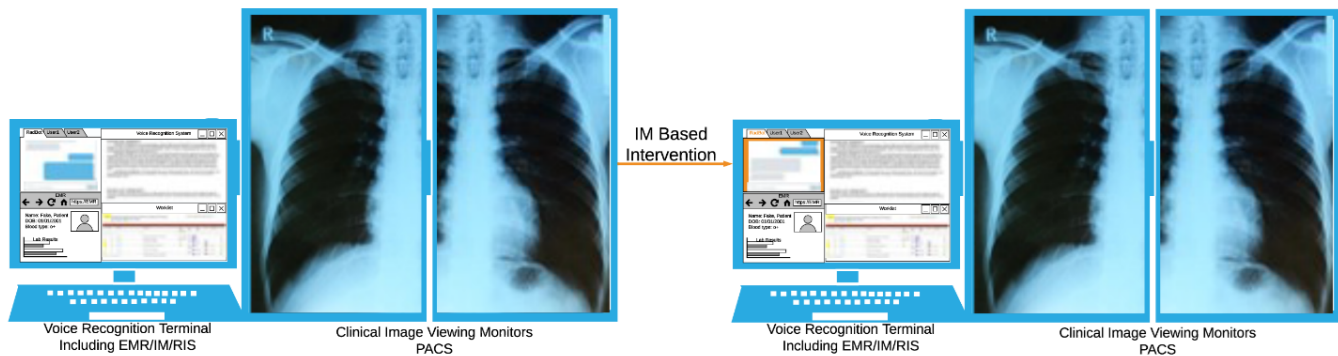

Text of the IM conversation follows. Message authors are indicated by **System** for automated messages and **Radiologist** for your response.

**System:** Based on your report text I am initiating the LUNG-RADS reporting tool. I have 2 recommended additions. Type 'Y' to add to the report and 'N' to move on.

**System:** Addition after TECHNIQUE, before FINDINGS sections:  
"RADIATION DOSE: 1 Volumetric series was performed for this exam.  
CTDIvol (CT dose Index-volume) = 2.5 mG  
DLP (Dose Length Product) = 80 mG cm"

**Radiologist:** Y

**System:** Addition in IMPRESSION:

"Lung Cancer Screening: LungRADS Category 2, Benign appearing (non-actionable) nodule(s). These types of nodules are commonly observed and require no immediate action. Current recommendations for eligible high risk individuals (criteria below) are routine annual screening with low dose CT."

**Radiologist:** Y

**System:** Additions were added to the draft report and are now available for your review.

140

141 **Fig 1. Sample PACS workstation before/after IM based intervention, and details of intervention presented to survey takers. Source**  
142 **images for Lung X-Ray (69), Report (70), and IM transaction (71). LUNG-RAD scenario and output text (72).**

## 143 2.3 Interview

144 Using the research statements developed with the survey (S1 Appendix A.5), we generated hypothesis and began  
145 developing the semi-structured interviews. As we did not have a working system, we prototyped 5 interventions and created  
146 video examples of each to use during the interview. Fig 2 highlights what these videos looked like during a demo. The videos  
147 highlighted interventions during each workflow time point in the following ways:

- 148 • After Image Acquisition



- 149 ○ Video 1 – Radibot identifies potential for 3d reconstruction, asks radiologist permission to process, and then
- 150 suggests the correct VR template.
- 151 ● During Report Creation
  - 152 ○ Video 2 – Radiologist engages Radibot to query the Electronic Medical Record (EMR) for cardiac risk
  - 153 factors. Radibot performs this query as the radiologist returns to reviewing images, then returns all risk factors
  - 154 that meet these criteria.
  - 155 ○ Video 3 – Radibot identifies VR dictation of left adrenal nodule then engages radiologist in stepping through
  - 156 adrenal nodule flow chart. Completion of the flowchart inserts guideline recommend text and citation into
  - 157 report.
- 158 ● After Report Creation
  - 159 ○ Video 4 – Based on text of report, Radibot engages radiologist for follow up communication.
- 160 ● Between Studies
  - 161 ○ Video 5 – Radibot presents possible studies for radiologists to engage with, removing the need to navigate
  - 162 the worklist. Includes suggestions of cross coverage of busier worklists and high priority studies.

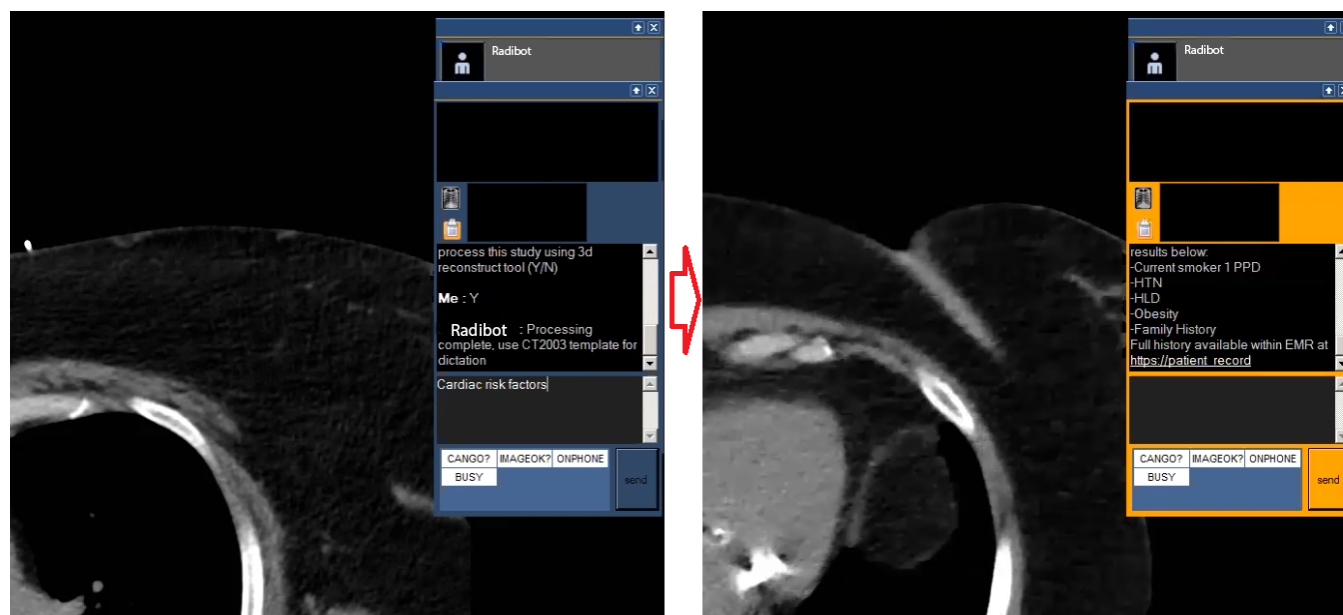

163  
164 **Fig 2. Capture from Video 2 highlighting radiologist query and Radibot response**

165 An interview guide was created (S1 Appendix B.1) following the UTAUT framework. The guide begins with video  
166 1, loops through each video asking the same questions, then has a set of questions after all videos have completed. A portable

167 interview setup was created consisting of one laptop, a 4k portrait monitor mimicking a diagnostic monitor, and a microphone  
168 for collecting audio. Interviews occurred in offices/conference rooms located near interview candidates normal work locations.  
169 Subjects were presented with consent and informed that no names would be utilized during the interview for confidentiality.  
170 Zoom was utilized to record the screen and interview narrative to the laptop (73).

171 39 survey participants responded that they would complete an interview. 23 interviews occurred before the research  
172 team agreed that response saturation was achieved. Interviews were transcribed using Otter.AI, then a research assistant and  
173 study team member reviewed each video separately and corrected any transcription errors (74). Transcriptions were  
174 downloaded in docx format, then loaded into ATLAS.ti 9.0.19.0 for qualitative analysis. The study team created labels for text  
175 analysis (S1 Appendix B.2) and linked these by semantic domain (UTAUT construct). 2 research assistants were hired and  
176 trained by the study team to annotate interview text using ATLAS.ti. The research assistants separately annotated interview 1,  
177 then the study team reviewed and provided additional guidance. They then separately annotated the remaining interview  
178 narratives, and the annotated narratives were merged, and inter-rater agreement is measured. Because semantic domains are  
179 established and we did not segment quotes in advance, Krippendorff's CU Alpha is utilized to measure semantic domain  
180 agreement by quote. An overall agreement level of  $\alpha \geq .8$  is set for all documents (75).

## 181 3 Results

### 182 3.1 Survey Data Analysis

183 Resulting data was downloaded from Qualtrics in Comma Separated Values (CSV) format and analyzed using Excel.  
184 Irrelevant metadata fields were removed. A total of 88 survey responses were used for analysis, representing 50.6 percent of  
185 the total sample population. After removing 4 outliers that took over an hour to complete the survey, average completion time  
186 was found to be 6 minutes and 45 seconds. Raw survey data is available in S2 Survey Data.

187 Qualitative questions were bucketed into numbers ranging from 0-5 (IE 0 to 5 years = 1; 5 to 10 years = 2; etc.). A  
188 full set of questions, response bucketing, and UTAUT constructs are included the S1 Appendix A.2. Summary data surrounding  
189 survey responses used in the analysis are listed in table 2.

190 **Table 2 Summary data for Likert scale questions in survey responses, generated using SmartPLS v. 3.2.9**

| Question | Mean | Median | Min | Max | Standard Deviation | Excess Kurtosis | Skewness |
|----------|------|--------|-----|-----|--------------------|-----------------|----------|
|----------|------|--------|-----|-----|--------------------|-----------------|----------|

|                                   |       |   |   |   |       |        |        |
|-----------------------------------|-------|---|---|---|-------|--------|--------|
| <b>Years Practiced – Q1</b>       | 2.326 | 2 | 1 | 5 | 1.434 | -0.932 | 0.659  |
| <b>Years Old – Q2</b>             | 2.523 | 2 | 1 | 5 | 0.937 | -0.512 | 0.32   |
| <b>Radiologist Tools – Q4</b>     | 2.326 | 2 | 1 | 5 | 0.982 | -0.162 | 0.426  |
| <b>Consumer IM – Q5</b>           | 2.488 | 2 | 1 | 5 | 0.774 | 0.556  | 1.189  |
| <b>Clinical IM – Q6</b>           | 3.023 | 3 | 1 | 5 | 1     | -0.606 | 0.379  |
| <b>Conversational Agents – Q7</b> | 3.128 | 3 | 1 | 5 | 1.076 | -0.632 | 0.481  |
| <b>PE1 – Q11</b>                  | 3.733 | 4 | 2 | 5 | 0.813 | -0.354 | -0.259 |
| <b>EOU1 – Q12</b>                 | 3.919 | 4 | 2 | 5 | 0.554 | 1.57   | -0.452 |
| <b>AF1 – Q13</b>                  | 3.733 | 4 | 2 | 5 | 0.722 | -0.22  | -0.106 |
| <b>ANX1 – Q14</b>                 | 2.733 | 3 | 1 | 5 | 1.083 | -0.859 | 0.275  |
| <b>BI1 – Q15</b>                  | 3.872 | 4 | 2 | 5 | 0.679 | 0.219  | -0.289 |
| <b>PE2 – Q16</b>                  | 3.849 | 4 | 2 | 5 | 0.691 | 0.467  | -0.434 |
| <b>AF2 – Q17</b>                  | 3.791 | 4 | 2 | 5 | 0.779 | -0.098 | -0.36  |
| <b>EOU2 – Q18</b>                 | 3.709 | 4 | 2 | 5 | 0.68  | 0.068  | -0.235 |
| <b>ANX2 – Q19</b>                 | 2.465 | 2 | 1 | 5 | 0.936 | -0.377 | 0.665  |
| <b>PE3 – Q20</b>                  | 3.279 | 3 | 1 | 5 | 0.83  | 0.188  | -0.321 |
| <b>BI2 – Q21</b>                  | 3.837 | 4 | 2 | 5 | 0.626 | 1.44   | -0.731 |
| <b>ANX3 – Q22</b>                 | 2.663 | 2 | 1 | 5 | 0.96  | -0.86  | 0.247  |

191

192

193

194

195

196

Partial Least Squares (PLS) Structured Equation Modeling (SEM) was utilized to investigate the relationship between constructs. PLS-SEM calculations were performed using SmartPLS V. 3.2.9. Complete data analysis steps are included in the Supplemental Data Analysis (S1 Appendix A.3). SEM began with connecting all possible paths, then eliminating construct relationships that were insignificant. The final SEM is presented in Fig 3 and details in table 3. T statistics for each path are greater than 1.95 and p values are below 0.05, indicating that each relationship is statistically significant.

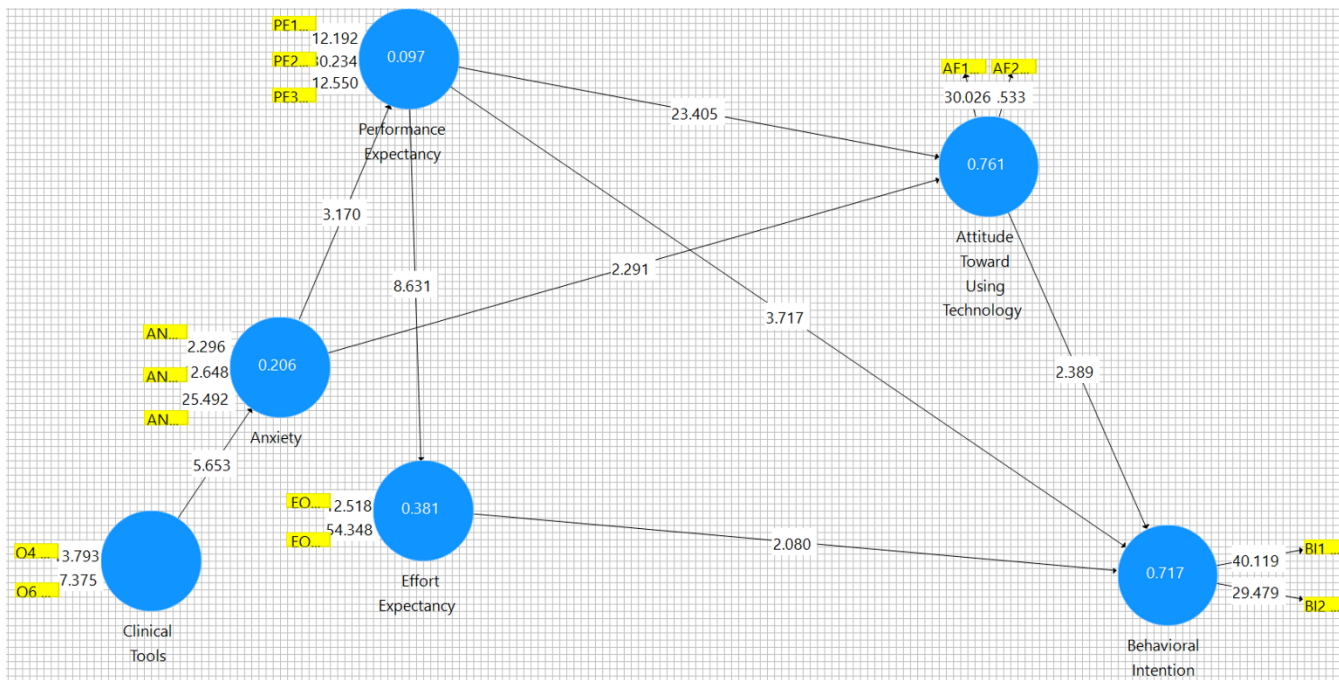

197

198 **Fig 3. Final Path Model generated using SmartPLS v. 3.2.9 Bootstrapping**

**Table 3 Final Path Coefficient Report generated using SmartPLS v. 3.2.9 Bootstrapping**

|                                                                      | Original Sample (O) | Sample Mean (M) | Standard Deviation (STDEV) | T Statistics ( O/STDEV ) | P Values |
|----------------------------------------------------------------------|---------------------|-----------------|----------------------------|--------------------------|----------|
| <b>Anxiety -&gt; Attitude Toward Using Technology</b>                | -0.127              | -0.127          | 0.056                      | 2.291                    | 0.022    |
| <b>Anxiety -&gt; Performance Expectancy</b>                          | -0.312              | -0.326          | 0.098                      | 3.17                     | 0.002    |
| <b>Attitude Toward Using Technology -&gt; Behavioral Intention</b>   | 0.329               | 0.326           | 0.138                      | 2.389                    | 0.017    |
| <b>Clinical Tools -&gt; Anxiety</b>                                  | 0.453               | 0.464           | 0.08                       | 5.653                    | 0        |
| <b>Effort Expectancy -&gt; Behavioral Intention</b>                  | 0.202               | 0.194           | 0.097                      | 2.08                     | 0.038    |
| <b>Performance Expectancy -&gt; Attitude Toward Using Technology</b> | 0.824               | 0.824           | 0.035                      | 23.405                   | 0        |
| <b>Performance Expectancy -&gt; Behavioral Intention</b>             | 0.399               | 0.408           | 0.107                      | 3.717                    | 0        |
| <b>Performance Expectancy -&gt; Effort Expectancy</b>                | 0.617               | 0.619           | 0.072                      | 8.631                    | 0        |

199

200 Table 4 Cronbach's Alpha report shows that the t statistic is greater than double the standard deviation, and this  
 201 indicates the model fits 95% of the data. Table 5 Average Variance Extracted additionally shows strong model fit. Fig 4 Partial  
 202 Least Squares model was created to determine path coefficients – table 6, and construct validity – table 7.

203 **Table 4 Cronbach's Alpha Report generated using SmartPLS v. 3.2.9 Bootstrapping**

|                                  | Original Sample (O) | Sample Mean (M) | Standard Deviation (STDEV) | T Statistics ( O/STDEV ) | P Values |
|----------------------------------|---------------------|-----------------|----------------------------|--------------------------|----------|
| Anxiety                          | 0.617               | 0.61            | 0.085                      | 7.298                    | 0        |
| Attitude Toward Using Technology | 0.752               | 0.747           | 0.066                      | 11.485                   | 0        |
| Behavioral Intention             | 0.756               | 0.752           | 0.068                      | 11.075                   | 0        |
| Clinical Tools                   | 0.489               | 0.484           | 0.131                      | 3.734                    | 0        |
| Effort Expectancy                | 0.713               | 0.704           | 0.08                       | 8.92                     | 0        |
| Performance Expectancy           | 0.755               | 0.751           | 0.054                      | 13.97                    | 0        |

204 Table 5 Average Variance Extracted (AVE) Report generated using SmartPLS v. 3.2.9 Bootstrapping

|                                  | Original Sample (O) | Sample Mean (M) | Standard Deviation (STDEV) | T Statistics ( O/STDEV ) | P Values |
|----------------------------------|---------------------|-----------------|----------------------------|--------------------------|----------|
| Anxiety                          | 0.568               | 0.569           | 0.051                      | 11.249                   | 0        |
| Attitude Toward Using Technology | 0.801               | 0.8             | 0.041                      | 19.594                   | 0        |
| Behavioral Intention             | 0.804               | 0.803           | 0.043                      | 18.614                   | 0        |
| Clinical Tools                   | 0.66                | 0.659           | 0.058                      | 11.467                   | 0        |
| Effort Expectancy                | 0.772               | 0.767           | 0.051                      | 15.171                   | 0        |
| Performance Expectancy           | 0.665               | 0.665           | 0.05                       | 13.394                   | 0        |

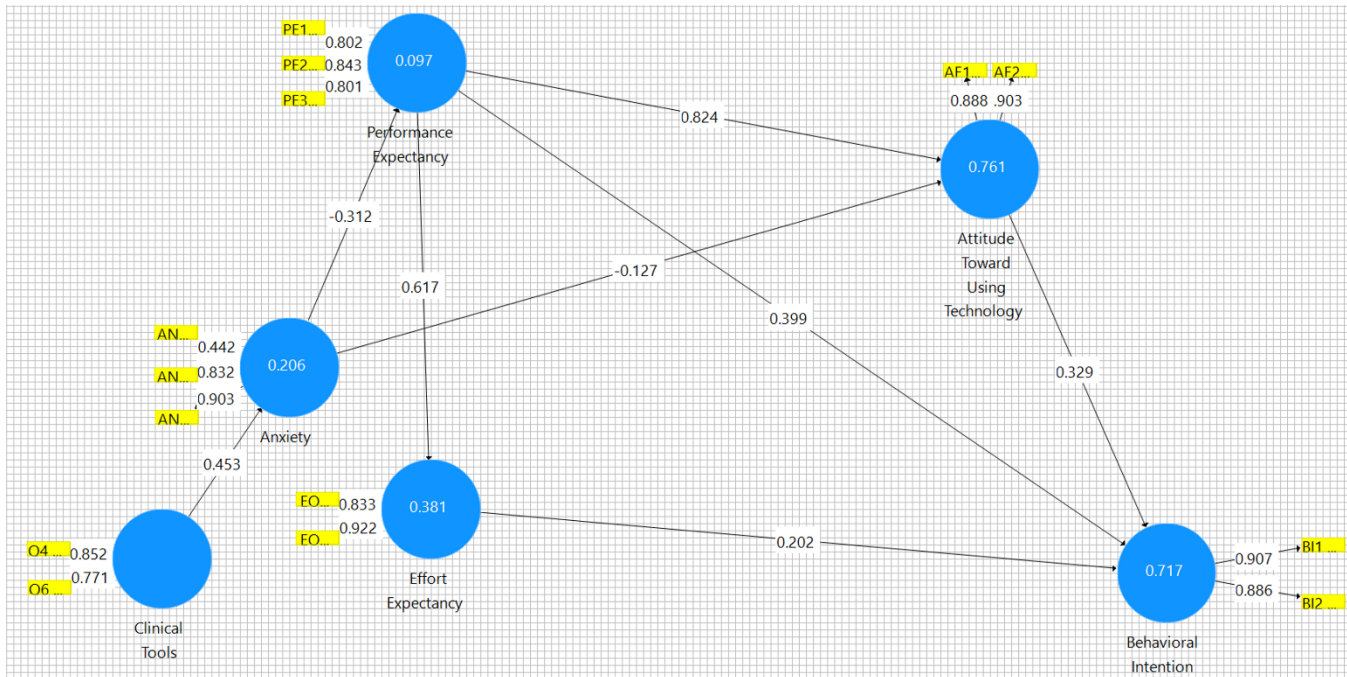

205  
206 Fig 4. Partial Least Squares Path Model generated using SmartPLS v. 3.2.9 PLS

207 **Table 6 Partial Least Squares Path Coefficients Report generated using SmartPLS v. 3.2.9 PLS**

|                                  | Anxiety | Attitude Toward Using Technology | Behavioral Intention | Clinical Tools | Effort Expectancy | Performance Expectancy |
|----------------------------------|---------|----------------------------------|----------------------|----------------|-------------------|------------------------|
| Anxiety                          |         | -0.127                           |                      |                |                   | -0.312                 |
| Attitude Toward Using Technology |         |                                  | 0.329                |                |                   |                        |
| Behavioral Intention             |         |                                  |                      |                |                   |                        |
| Clinical Tools                   | 0.453   |                                  |                      |                |                   |                        |
| Effort Expectancy                |         |                                  | 0.202                |                |                   |                        |
| Performance Expectancy           |         | 0.824                            | 0.399                |                | 0.617             |                        |

208

209 **Table 7 Partial Least Squares Construct Reliability and Validity Report generated using SmartPLS v. 3.2.9 PLS**

|                                  | Cronbach's Alpha | rho_A | Composite Reliability | Average Variance Extracted (AVE) |
|----------------------------------|------------------|-------|-----------------------|----------------------------------|
| Anxiety                          | 0.617            | 0.768 | 0.786                 | 0.568                            |
| Attitude Toward Using Technology | 0.752            | 0.755 | 0.89                  | 0.801                            |
| Behavioral Intention             | 0.756            | 0.761 | 0.891                 | 0.804                            |
| Clinical Tools                   | 0.489            | 0.501 | 0.795                 | 0.66                             |
| Effort Expectancy                | 0.713            | 0.777 | 0.871                 | 0.772                            |
| Performance Expectancy           | 0.755            | 0.784 | 0.856                 | 0.665                            |

210

211

212

213

214

215

216

217 These final sets of reports explain the model and variance encountered in the model. The weakest relationships  
 218 surround ANX. Based on this analysis, we know that Clinical Tools strongly influences ANX, however, Clinical Tools has the

219 lowest Cronbach’s Alpha and Adjusted Rho of all reviewed items. ANX also has a less than ideal Cronbach’s Alpha, but other  
 220 indicators show that it is likely a reliable concept.

## 221 3.2 Interview Data Analysis

222 The average interview time was 39.93 minutes. Krippendorff’s CU Alpha was generated at an individual narrative  
 223 (S1 Appendix B.3) and overall level. Interviews were eliminated until the overall level reached  $\alpha \geq .8$ , resulting in  $\alpha = 0.82$ .  
 224 Code co-occurrence was measured by hypothesis and Sankey diagrams generated (S1 Appendix B.4).

## 225 3.3 Survey Results

226 Table 8 includes the outcomes of each hypothesis for the survey. Results are expanded upon in S1 Appendix A.4.  
 227 Hypotheses were tested at a 95% significance level.

228 **Table 8 Survey Hypotheses tested, P-values, and outcomes.**

| Hypothesis                                                                                                                                                       | P-Value  | Reject Null |
|------------------------------------------------------------------------------------------------------------------------------------------------------------------|----------|-------------|
| <b>H1: Radiologists have intent to use an IM based conversational agent</b>                                                                                      | <0.001   | Yes         |
| H1-A: Intent is moderated by performance expectancies                                                                                                            | <0.001   | Yes         |
| H1-B: Intent is moderated by effort expectancies                                                                                                                 | <0.001   | Yes         |
| H1-C: Intent is moderated by anxiety                                                                                                                             | 0.514    | No          |
| H1-D: Intent is moderated by age                                                                                                                                 | 0.103    | No          |
| H1-E: Intent is moderated by radiologist’s experience with general consumer conversational agents and experience with radiology domain specific clinical tools   | 0.336    | No          |
| H1-F: Intent is moderated by attitude toward the system                                                                                                          | 0.017    | Yes         |
| <b>H2: Radiologists attitude toward the IM based conversational agent is positive</b>                                                                            | <0.001   | Yes         |
| H2-A: Attitude is moderated by performance expectancies                                                                                                          | <0.001   | Yes         |
| H2-B: Attitude is moderated by effort expectancies                                                                                                               | 0.056    | No          |
| H2-C: Attitude is moderated by anxiety                                                                                                                           | 0.022    | Yes         |
| H2-D: Attitude is moderated by age                                                                                                                               | 0.103    | No          |
| H2-E: Attitude is moderated by radiologist’s experience with general consumer conversational agents and experience with radiology domain specific clinical tools | 0.371    | No          |
| <b>H3: Age influences radiologist’s perspective of the intervention</b>                                                                                          | Multiple | No          |
| <b>H4: Experience with consumer conversational agent’s moderate’s radiologist’s perspective of the intervention</b>                                              | Multiple | No          |
| <b>H5: Experience with consumer and clinical IM tools moderate’s radiologist’s perspective of the intervention.</b>                                              | Multiple | No          |
| <b>H6: Experience with radiology domain specific clinical tools moderate’s radiologist’s perspective of the intervention.</b>                                    | Multiple | Yes         |

229

230

231

232

233

234

235

236

237

### 238 **3.4 Interview Results**

239 Table 9 includes the outcomes of each hypothesis for the interview. Interpretation, code co-occurrence tables, and  
240 Sankey diagrams supporting results are found in S1 Appendix B.4.

241 **Table 9 Interview Hypotheses tested.**

| Hypothesis                                                                                                                                                   | Reject Null |
|--------------------------------------------------------------------------------------------------------------------------------------------------------------|-------------|
| <b>H1: Expected effort is not a contributing factor in attitude towards the intervention but is a contributing factor in intent to use the intervention.</b> | No          |



|                                                                                                                                                                                                                                |     |
|--------------------------------------------------------------------------------------------------------------------------------------------------------------------------------------------------------------------------------|-----|
| <b>H2: With respect to this intervention, anxiety has a negative relationship with performance expectancy. As anxiety increases, performance expectancy decreases. As anxiety decreases, performance expectancy increases.</b> | No  |
| <b>H3: Radiologists have a positive attitude towards this intervention and a high intent to use this intervention if it were produced.</b>                                                                                     | Yes |
| <b>H4: For this intervention, intent to use and attitude are mostly influenced by performance expectancies.</b>                                                                                                                | No  |
| H4-A: Radiologist's attitude towards this intervention is mostly influenced by the expected performance of the system.                                                                                                         | No  |
| H4-B: Radiologist's intent to use this intervention is mostly influenced by expected performance of the system.                                                                                                                | No  |
| <b>H5: Radiologist's performance expectancies positively influence their effort expectancies. As expected performance increases, expected effort decreases.</b>                                                                | Yes |

242

## 243 **5 Discussion**

244 Radiologists have a high intent to use and positive attitudes towards IM based CDSS and the presented interventions  
245 overall. We determined that years of experience, and Consumer Tools (IM and CA) were not moderating variables in our  
246 model. In any given path, the t statistic was too low and p value too high to consider this in our analysis. These questions are  
247 not a part of the UTAUT model, and we found them not to be factors relevant to our efforts. The following UTAUT expected  
248 paths were additionally removed, and speculation as to why is included:

### 249 **5.1 Age and Intent to Use**

250 This is a deviation from UTAUT. Potentially, radiologists are technologically saturated users; they perform their work  
251 functions using a wide variety of complex technological solutions. Among clinicians, radiologists chose this specialty because  
252 of their interest in technology solutions within healthcare. We were unable to measure this result during interviews.

### 253 **5.2 Expected Efforts Influence on Attitude**

254 The survey and interview studies have opposing results for expected efforts influence on attitude. The survey deviated  
255 from UTAUT in not finding an association with attitude. However, the interview study showed that decreasing effort is linked  
256 to positive attitude and positive intent to use. Common themes on effort/attitude interactions-

- 257 • Reducing time to acquire and apply clinical knowledge.

- 258           ○ “...however many seconds it takes for everyone...and it's different for everyone to figure out how they want  
259           to go about finding this information. We all kind of I think most people know where to look IE the ACR  
260           guidelines, but...having this thought process kind of forcing us to focus on this dialog box kind of streamlines  
261           that whole process. So I think overall, it should enhance the workflow”
- 262           ○ “...these are the things when we're not given enough information...Some people persevere on the lack of  
263           information more than others. And some people are really dutiful and want to go into the EMR and look, but  
264           that could be one to two minutes, and then compound that over an entire shift. Do that a couple times. That  
265           could be an hour that you've saved if you had this information in a ready format, or in a readily available  
266           format, so I think this definitely makes you, from this particular type of interactions definitely makes you  
267           more efficient, I believe.”
- 268           • Increasing multitasking
- 269           ○ “I think it is a great idea. I think it helps you do multiple things, maybe not just in this cardiac workup. But  
270           like for lung nodules when your kind of trying to decide what the appropriate workup is. We always have a  
271           caveat that takes seconds to say but it's still seconds that you have to say it every time. You know, if the  
272           patient has high risk for pulmonary malignancy recommend whatever. We know that they're already high  
273           risk for whatever, then I feel like we don't need to say that. Or if that even auto populates the patient has these  
274           risk factors that we would recommend discussing these risk factors.”
- 275           • Trusting CDSS as safety nets
- 276           ○ “...we touted on AI is not to replace your diagnostic skills, but eight other things, whether it's making you  
277           more efficient or providing kind of a little safety net, right. Maybe you forgot to mention a follow up or  
278           something that really should be a critical result.”

### 279 **5.3 Anxieties influence on Attitude**

280           The survey shows a small negative relationship with attitude. The interview study asked many questions to understand  
281           anxiety surrounding this intervention, however, we were unable to strongly correlate with attitude. Overall, anxiety is the least  
282           grounded concept throughout the interview.

## 283 **5.4 Expected Performance as the Major Influencer of Attitude and Intent** 284 **to Use**

285 Overall, expected performance is a major influence on attitude and intent to use. Within the survey results it has  
286 significantly more influence than any other factor. However, the interview results show a stronger correlation of expected effort  
287 with attitude and intent to use. There is a strong negative relationship between performance and effort present in both phases  
288 of the study, another deviation from the UTAUT model. There is potential that radiologists' system use is derived from  
289 performance, maybe measured in clinical outcomes. However, we cannot assume these performance metrics overcome effort  
290 needs. Common themes from factors influencing attitude/intent to use-

- 291 • Radiologists expect to be interrupted or context switch quickly.
  - 292 ○ “Interrupt My normal workflow? Well, I guess it depends on what is normal. This would not interrupt my  
293 normal workflow. We’re constantly getting interrupted. It would just be another interruption among a series  
294 of normal interruptions.”
  - 295 ○ “...this is kind of the thought process that I, this is I go through this checklist. Basically, every time I close a  
296 study, we look at the work list again. I’m thinking to myself, looking over my shoulder at the residents and  
297 looking at their, their work list, and thinking about [county hospital] over here, looking at how deep my work  
298 list is how far so I basically run this checklist mentally, in between each exam.”
- 299 • Reducing effort is highly embraced.
  - 300 ○ “I love the idea that I’m not having to call someone and that automatically reminds me and I can just either  
301 do one click and go one click would be nice to just be like, Yes.”
  - 302 ○ “the status quo is quicker or definitely is quicker than then that interface I just saw on the video.”
  - 303 ○ “...I’m responsible for all those things that I don’t see on a regular basis...Let me go back to that algorithm  
304 figure out what I need to say. This would be a really great tool for me in those cases, because I don’t have to  
305 worry as much I think I’m missing a recommendation or something like that. I don’t have to hedge as much.  
306 I don’t have to hurry try to get to get to my list. Luckily, we don’t aren’t too inundated so it’s not an issue  
307 but I do feel like this will help me to put the appropriate things in with the appropriate recommended”

- 308           ○ “Well, it would shortcut having to call a technologist and initiate a conversation about what the patient was,  
309           what the study was, the post processing that you needed, done. So if the radbot could predict that you might  
310           need it. And could figure out what you needed quicker and would negate having that phone call that would  
311           be positive.”
- 312           • Radiologists will trade effort for performance.
- 313           ○ “So it slows you down slightly, but in the long run of collections and all that stuff. Yeah, I think it would  
314           [improve performance], because you’re making sure you get reimbursed and get the correct RVU amounts  
315           for the right study.”
- 316           ○ “... the amount of time it takes to look those things up, and it’s not super frequent, but not super  
317           infrequent...either it’s taking you more time to figure it out or you also end up with more a variation amongst  
318           different radiologists for the recommendation. So you’re not only might save time, but you might also  
319           decrease the heterogeneity of the recommendations. And probably more, you’d be probably more likely to  
320           actually be following the guidelines since you’d be prompted to to adhere to them.”
- 321           ○ “...I think maybe it slows you slightly on the front end, but on the back end, it helps you, and it helps  
322           clinicians too”
- 323           ○ “I think it would decrease my productivity very minimally. But for a good cause.”

## 324 **5.5 Conclusion**

325           “No, I think again, this is it's all these videos have demonstrated processes which are mostly done mentally by all  
326           radiologists. And again, it's not always easy to kind of put these things on a screen or you know, because your kind of you're,  
327           you're juggling a couple different priorities at the same time. So, I think this is kind of taking an existing thing and it's making  
328           a more organized and streamlined fashion.”

329           Radiologist’s interactions with decision support tools, or at least this intervention, differs from the standard user  
330           software interaction model. The positive relationship from performance to effort is the most major deviation, allowing  
331           increasing effort if the outcomes are desirable enough. This relationship is supported by both the survey and interview studies.  
332           Further, because performance and effort make up most of attitude and intent to use, there are a lot of opportunities for CDSS  
333           to provide novel workflow changes that increase patient outcomes. CDSS should be designed to streamline activities, and we  
334           see particular interest in tools to enable clinical knowledge gathering and context switching.

335 “Yeah, assuming that you would have gone to the EMR it was important enough to go there. And if you went there to  
336 take more time, okay. But at the same point, you know, it might change the threshold at which you would ask a question, right?  
337 It's like, it'd be nice if we knew this and it's easy just to query it. But you otherwise might not go to the EMR.”

338 Anxiety is another large deviation from the standard user model. In both parts of the study anxiety had the weakest  
339 relationships and was often secondary to the excitement of new clinical solutions. The most common source of anxiety  
340 surrounds the maintenance of CDSS “I guess the part that causes me to pause is who's going to be mining for new updates?  
341 And how can we be sure that we're staying current on recommendations? You know, how is that? Who's going to handle that  
342 part of it?”

343 Radiologists deviate from the standard clinician with regards to the 10 commandments of CDSS. Commandments 2,  
344 3, 7, 10, and 1 – anticipate needs, fit into user workflow, simple interventions, knowledge system maintenance, and speed – are  
345 all highlighted within radiology specific guidance, and we do find these present for radiologists in our study. However, the  
346 relationship between performance and effort highlights that radiologist CDSS doesn't need to always hit every commandment.  
347 Radiologists expect workflow modification, they routinely use complex interventions, and they are not overwhelmed by CDSS  
348 information gathering. As we design for the future radiologist, we can trade effort in these commandments for increasing  
349 positive outcomes.

## 350 References

- 351 1 Choy G, Khalilzadeh O, Michalski M, Do S, Samir AE, Panykh OS, et al. Current Applications and Future  
352 Impact of Machine Learning in Radiology. *Radiology*. 2018 Aug;288(2):318–28.
- 353 2 Dreyer KJ, Geis JR. When Machines Think: Radiology's Next Frontier. *Radiology*. 2017 Dec;285(3):713–8.
- 354 3 Gichoya JW, Alarifi M, Bhaduri R, Tahir B, Purkayastha S. Using cognitive fit theory to evaluate patient  
355 understanding of medical images. Annual International Conference of the IEEE Engineering in Medicine  
356 and Biology Society IEEE Engineering in Medicine and Biology Society Annual International Conference  
357 [Internet]. 2017 Jul 1 [cited 2023 Mar 23];2017:2430–3. Available from:  
358 <https://pubmed.ncbi.nlm.nih.gov/29060389/>
- 359 4 Gichoya J, Nuthakki S, Maity PG, Purkayastha S. Phronesis of AI in radiology: Superhuman meets natural  
360 stupidity. *ArXiv [Internet]*. 2018 [cited 2023 Mar 23]; Available from:  
361 <https://www.semanticscholar.org/paper/Phronesis-of-AI-in-radiology%3A-Superhuman-meets-Gichoya-Nuthakki/57e870688e760fe04f5b2db3ddd5d42897cc2d0d>
- 362 5 Venkatesh V, Morris MG, Davis GB, Davis FD. User Acceptance of Information Technology: toward a  
363 Unified View. *MIS Quarterly [Internet]*. 2003;27(3):425–78. Available from:  
364 <https://www.jstor.org/stable/pdf/30036540>
- 365

- 366 6 Lodwick GS, Turner AH, Lusted LB, Templeton AW. Computer-aided analysis of radiographic images.  
367 Journal of Chronic Diseases [Internet]. 1966 Apr 1 [cited 2023 Mar 23];19(4):485–96. Available from:  
368 <https://www.sciencedirect.com/science/article/abs/pii/0021968166901226>
- 369 7 Agrawal JP, Erickson BJ, Kahn CE. Imaging Informatics: 25 Years of Progress. Yearbook of Medical  
370 Informatics [Internet]. 2016 May 20;(Suppl 1):S23–31. Available from:  
371 <https://www.ncbi.nlm.nih.gov/pmc/articles/PMC5171495/>
- 372 8 Nowinski WL, Qian G, Hanley DF. A CAD System for Hemorrhagic Stroke. The Neuroradiology Journal.  
373 2014 Aug;27(4):409–16.
- 374 9 Stivaros SM, Gledson A, Nenadic G, Zeng X-J, Keane J, Jackson A. Decision support systems for clinical  
375 radiological practice — towards the next generation. The British Journal of Radiology. 2010  
376 Nov;83(995):904–14.
- 377 10 Wang Y, Yan F, Lu X, Zheng G, Zhang X, Wang C, et al. IILS: Intelligent imaging layout system for  
378 automatic imaging report standardization and intra-interdisciplinary clinical workflow optimization.  
379 EBioMedicine. 2019 Jun;44:162–81.
- 380 11 L. Barinov *et al.*, "Impact of Data Presentation on Physician Performance Utilizing Artificial Intelligence-  
381 Based Computer-Aided Diagnosis and Decision Support Systems," (in eng), *J Digit Imaging*, vol. 32, no. 3,  
382 pp. 408-416, Jun 2019, doi: 10.1007/s10278-018-0132-5.
- 383 12 K. S. Berbaum and E. A. Franken, Jr., "Commentary does clinical history affect perception?," (in eng),  
384 *Acad Radiol*, vol. 13, no. 3, pp. 402-3, Mar 2006, doi: 10.1016/j.acra.2005.11.031.
- 385 13 K. S. Berbaum, E. A. Franken, Jr., D. D. Dorfman, and K. R. Lueben, "Influence of clinical history on  
386 perception of abnormalities in pediatric radiographs," (in eng), *Acad Radiol*, vol. 1, no. 3, pp. 217-23, Nov  
387 1994, doi: 10.1016/s1076-6332(05)80717-2.
- 388 14 A. Leslie, A. J. Jones, and P. R. Goddard, "The influence of clinical information on the reporting of CT by  
389 radiologists," *Br J Radiol*, vol. 73, no. 874, pp. 1052-1055, 2000, doi: 10.1259/bjr.73.874.11271897.
- 390 15 B. I. Reiner, "Medical Imaging Data Reconciliation, Part 3: Reconciliation of Historical and Current  
391 Radiology Report Data," *Journal of the American College of Radiology*, vol. 8, no. 11, pp. 768-771,  
392 2011/11/01/ 2011, doi: <https://doi.org/10.1016/j.jacr.2011.04.021>.
- 393 16 R. J. Gorniak *et al.*, "A PACS-Integrated Tool to Automatically Extract Patient History From Prior  
394 Radiology Reports," (in eng), *J Am Coll Radiol*, vol. 13, no. 10, pp. 1249-1252, Oct 2016, doi:  
395 10.1016/j.jacr.2016.06.004.
- 396 17 G. W. Boland *et al.*, "Decision support for radiologist report recommendations," (in eng), *J Am Coll*  
397 *Radiol*, vol. 8, no. 12, pp. 819-23, Dec 2011, doi: 10.1016/j.jacr.2011.08.003.
- 398 18 B. H. Do, A. S. Wu, J. Maley, and S. Biswal, "Automatic retrieval of bone fracture knowledge using natural  
399 language processing," (in eng), *J Digit Imaging*, vol. 26, no. 4, pp. 709-13, Aug 2013, doi:  
400 10.1007/s10278-012-9531-1.
- 401 19 M. Kohli *et al.*, "Bending the Artificial Intelligence Curve for Radiology: Informatics Tools From ACR and  
402 RSNA," (in eng), *J Am Coll Radiol*, Jul 15 2019, doi: 10.1016/j.jacr.2019.06.009.
- 403 20 Y. Liu, L. N. Zhu, Q. Liu, C. Han, X. D. Zhang, and X. Y. Wang, "Automatic extraction of imaging  
404 observation and assessment categories from breast magnetic resonance imaging reports with natural  
405 language processing," (in eng), *Chin Med J (Engl)*, vol. 132, no. 14, pp. 1673-1680, Jul 20 2019, doi:  
406 10.1097/cm9.0000000000000301.
- 407 21 M. Esmaeili, S. M. Ayyoubzadeh, N. Ahmadinejad, M. Ghazisaeedi, A. Nahvijou, and K. Maghooli, "A  
408 decision support system for mammography reports interpretation," (in eng), *Health Inf Sci Syst*, vol. 8,  
409 no. 1, p. 17, Dec 2020, doi: 10.1007/s13755-020-00109-5.
- 410 22 S. Bozkurt, F. Gimenez, E. S. Burnside, K. H. Gulkesen, and D. L. Rubin, "Using automatically extracted  
411 information from mammography reports for decision-support," (in eng), *Journal of biomedical*  
412 *informatics*, vol. 62, pp. 224-31, Aug 2016, doi: 10.1016/j.jbi.2016.07.001.

- 413 23 T. A. Patel *et al.*, "Correlating mammographic and pathologic findings in clinical decision support using  
414 natural language processing and data mining methods," (in eng), *Cancer*, vol. 123, no. 1, pp. 114-121,  
415 Jan 1 2017, doi: 10.1002/cncr.30245.
- 416 24 R. European Society of, "The future role of radiology in healthcare," (in eng), *Insights Imaging*, vol. 1, no.  
417 1, pp. 2-11, 2010, doi: 10.1007/s13244-009-0007-x.
- 418 25 D. L. Weiss, W. Kim, B. F. t. Branstetter, and L. M. Prevedello, "Radiology reporting: a closed-loop cycle  
419 from order entry to results communication," (in eng), *J Am Coll Radiol*, vol. 11, no. 12 Pt B, pp. 1226-37,  
420 Dec 2014, doi: 10.1016/j.jacr.2014.09.009.
- 421 26 P. A. Larson, L. L. Berland, B. Griffith, C. E. Kahn, Jr., and L. A. Liebscher, "Actionable findings and the role  
422 of IT support: report of the ACR Actionable Reporting Work Group," (in eng), *J Am Coll Radiol*, vol. 11,  
423 no. 6, pp. 552-8, Jun 2014, doi: 10.1016/j.jacr.2013.12.016.
- 424 27 X. Meng, C. H. Ganoë, R. T. Sieberg, Y. Y. Cheung, and S. Hassanpour, "Assisting radiologists with  
425 reporting urgent findings to referring physicians: A machine learning approach to identify cases for  
426 prompt communication," (in eng), *Journal of biomedical informatics*, vol. 93, p. 103169, May 2019, doi:  
427 10.1016/j.jbi.2019.103169.
- 428 28 R. Lacson *et al.*, "Four-year impact of an alert notification system on closed-loop communication of  
429 critical test results," (in eng), *AJR Am J Roentgenol*, vol. 203, no. 5, pp. 933-8, Nov 2014, doi:  
430 10.2214/ajr.14.13064.
- 431 29 A. B. Rosenkrantz, J. Sherwin, C. P. Prithiani, D. Ostrow, and M. P. Recht, "Technology-Assisted Virtual  
432 Consultation for Medical Imaging," (in eng), *J Am Coll Radiol*, vol. 13, no. 8, pp. 995-1002, Aug 2016, doi:  
433 10.1016/j.jacr.2016.02.029.
- 434 30 B. I. Reiner, "Redefining the Practice of Peer Review Through Intelligent Automation-Part 3: Automated  
435 Report Analysis and Data Reconciliation," (in eng), *J Digit Imaging*, vol. 31, no. 1, pp. 1-4, Feb 2018, doi:  
436 10.1007/s10278-017-0006-2.
- 437 31 B. I. Reiner, "Quantifying Analysis of Uncertainty in Medical Reporting: Creation of User and Context-  
438 Specific Uncertainty Profiles," (in eng), *J Digit Imaging*, vol. 31, no. 4, pp. 379-382, Aug 2018, doi:  
439 10.1007/s10278-018-0057-z.
- 440 32 J. L. Burns, D. Hasting, J. W. Gichoya, B. McKibben, 3rd, L. Shea, and M. Frank, "Just in Time Radiology  
441 Decision Support Using Real-time Data Feeds," (in eng), *J Digit Imaging*, Sep 12 2019, doi:  
442 10.1007/s10278-019-00268-2.
- 443 33 R. Chen, P. Mongkolwat, and D. S. Channin, "RadMonitor: radiology operations data mining in real time,"  
444 (in eng), *J Digit Imaging*, vol. 21, no. 3, pp. 257-68, Sep 2008, doi: 10.1007/s10278-007-9033-8.
- 445 34 J. W. Nance, Jr., C. Meenan, and P. G. Nagy, "The future of the radiology information system," (in eng),  
446 *AJR Am J Roentgenol*, vol. 200, no. 5, pp. 1064-70, May 2013, doi: 10.2214/ajr.12.10326.
- 447 35 P. G. Nagy, M. J. Warnock, M. Daly, C. Toland, C. D. Meenan, and R. S. Mezrich, "Informatics in radiology:  
448 automated Web-based graphical dashboard for radiology operational business intelligence," (in eng),  
449 *Radiographics : a review publication of the Radiological Society of North America, Inc*, vol. 29, no. 7, pp.  
450 1897-906, Nov 2009, doi: 10.1148/rg.297095701.
- 451 36 M. B. Morgan, B. F. t. Branstetter, D. M. Lionetti, J. S. Richardson, and P. J. Chang, "The radiology digital  
452 dashboard: effects on report turnaround time," (in eng), *J Digit Imaging*, vol. 21, no. 1, pp. 50-8, Mar  
453 2008, doi: 10.1007/s10278-007-9008-9.
- 454 37 O. A. Awan, F. van Wagenberg, M. Daly, N. Safdar, and P. Nagy, "Tracking delays in report availability  
455 caused by incorrect exam status with Web-based issue tracking: a quality initiative," (in eng), *J Digit  
456 Imaging*, vol. 24, no. 2, pp. 300-7, Apr 2011, doi: 10.1007/s10278-010-9330-5.
- 457 38 H. International. "HL7 International." <http://www.hl7.org/> (accessed 9/23/2019, 2019).
- 458 39 D. Library. "About DICOM." <https://www.dicomlibrary.com/dicom/> (accessed 9/23/2019, 2019).
- 459 40 M. Kohli, K. J. Dreyer, and J. R. Geis, "Rethinking Radiology Informatics," *American Journal of  
460 Roentgenology*, vol. 204, no. 4, pp. 716-720, 2015/04/01 2015, doi: 10.2214/AJR.14.13840.

- 461 41 D. Teather, B. A. Morton, G. H. du Boulay, K. M. Wills, D. Plummer, and P. R. Innocent, "Computer  
462 assistance for C.T. scan interpretation and cerebral disease diagnosis," (in eng), *Stat Med*, vol. 4, no. 3,  
463 pp. 311-5, Jul-Sep 1985, doi: 10.1002/sim.4780040310.
- 464 42 R. Khorasani, "Clinical decision support in radiology: what is it, why do we need it, and what key features  
465 make it effective?," (in eng), *J Am Coll Radiol*, vol. 3, no. 2, pp. 142-3, Feb 2006, doi:  
466 10.1016/j.jacr.2005.11.008.
- 467 43 D. W. Bates *et al.*, "Ten commandments for effective clinical decision support: making the practice of  
468 evidence-based medicine a reality," (in eng), *Journal of the American Medical Informatics Association :  
469 JAMIA*, vol. 10, no. 6, pp. 523-30, Nov-Dec 2003, doi: 10.1197/jamia.M1370.
- 470 44 S. E. Cheeseman, "Communication and collaboration technologies," (in eng), *Neonatal Netw*, vol. 31, no.  
471 2, pp. 115-9, Mar-Apr 2012, doi: 10.1891/0730-0832.31.2.115.
- 472 45 C. Pimmer, S. Mhango, A. Mzumara, and F. Mbvundula, "Mobile instant messaging for rural community  
473 health workers: a case from Malawi," (in eng), *Glob Health Action*, vol. 10, no. 1, p. 1368236, 2017, doi:  
474 10.1080/16549716.2017.1368236.
- 475 46 J. R. Bautista and T. T. C. Lin, "Nurses' use of mobile instant messaging applications: A uses and  
476 gratifications perspective," (in eng), *Int J Nurs Pract*, vol. 23, no. 5, Oct 2017, doi: 10.1111/ijn.12577.
- 477 47 T. B. Iversen, L. Melby, and P. Toussaint, "Instant messaging at the hospital: supporting articulation  
478 work?," (in eng), *Int J Med Inform*, vol. 82, no. 9, pp. 753-61, Sep 2013, doi:  
479 10.1016/j.ijmedinf.2013.05.004.
- 480 48 C. Rosset, A. Rosset, and O. Ratib, "General consumer communication tools for improved image  
481 management and communication in medicine," (in eng), *J Digit Imaging*, vol. 18, no. 4, pp. 270-9, Dec  
482 2005, doi: 10.1007/s10278-005-6703-2.
- 483 49 L. Fratt, "PACS Powers the Enterprise," *Health Imaging Insights in Imaging & Informatics*, 10/15/2007.  
484 [Online]. Available: [https://www.healthimaging.com/topics/advanced-visualization/pacs-powers-](https://www.healthimaging.com/topics/advanced-visualization/pacs-powers-enterprise)  
485 [enterprise](https://www.healthimaging.com/topics/advanced-visualization/pacs-powers-enterprise)
- 486 50 "Philips Adds Options to PACS," *Imaging Technology News*, 6/11/2007. [Online]. Available:  
487 <https://www.itnonline.com/content/philips-adds-options-pacs>
- 488 51 A. Grabb, "Early experience with electronic messaging tightly integrated within PACS," (in eng), *J Am Coll  
489 Radiol*, vol. 8, no. 2, pp. 141-2, Feb 2011, doi: 10.1016/j.jacr.2010.10.007.
- 490 52 I. N. America. "INFINITT PACS." <https://www.infinittna.com/solutions/radiology/infinittna-pacs/> (accessed  
491 10/21/2019, 2019).
- 492 53 I. W. Health. "Merge PACS™ Innovative Reading Workflows for Enterprise Radiology "  
493 <https://www.merge.com/Solutions/Radiology/Merge-PACS.aspx> (accessed 10/21/2019, 2019).
- 494 54 I. Carestream Health. *RIS Module Streamlined Productivity*. (2018). [Online]. Available:  
495 [https://collaboration.carestream.com/sites/default/files/brochure\\_ris\\_module\\_201810.pdf](https://collaboration.carestream.com/sites/default/files/brochure_ris_module_201810.pdf)
- 496 55 Saince. "Saince Merge Enterprise PACS." [https://www.saince.com/international-solutions/saince-](https://www.saince.com/international-solutions/saince-enterprise-pacs/)  
497 [enterprise-pacs/](https://www.saince.com/international-solutions/saince-enterprise-pacs/) (accessed 10/21/2019, 2019).
- 498 56 S. Medical. "Sectra PACS and RIS - Examples of supported radiology workflows: Communication."  
499 <https://medical.sectra.com/product/sectra-radiology-pacs-ris/> (accessed 10/21/2019, 2019).
- 500 57 F. H. A. Corporation. "Synapse® EIS Features." [https://www.fujifilmusa.com/products/medical/medical-](https://www.fujifilmusa.com/products/medical/medical-informatics/radiology/RIS/index.html#features)  
501 [informatics/radiology/RIS/index.html#features](https://www.fujifilmusa.com/products/medical/medical-informatics/radiology/RIS/index.html#features) (accessed 10/21/2019, 2019).
- 502 58 A. HealthCare. "XERO Viewer All images, One View." [https://global.agfahealthcare.com/us/enterprise-](https://global.agfahealthcare.com/us/enterprise-imaging/universal-viewer/)  
503 [imaging/universal-viewer/](https://global.agfahealthcare.com/us/enterprise-imaging/universal-viewer/) (accessed 10/21/2019, 2019).
- 504 59 D. McFarlane, "Comparison of four primary methods for coordinating the interruption of people in  
505 human-computer interaction," *Hum.-Comput. Interact.*, vol. 17, no. 1, pp. 63-139, 2002, doi:  
506 10.1207/s15327051hci1701\_2.
- 507 60 M. Bates, "Health Care Chatbots Are Here to Help," (in eng), *IEEE Pulse*, vol. 10, no. 3, pp. 12-14, May-  
508 Jun 2019, doi: 10.1109/mpuls.2019.2911816.



- 509 61 L. Laranjo *et al.*, "Conversational agents in healthcare: a systematic review," (in eng), *Journal of the*  
510 *American Medical Informatics Association : JAMIA*, vol. 25, no. 9, pp. 1248-1258, Sep 1 2018, doi:  
511 10.1093/jamia/ocy072.
- 512 62 M. Beveridge and J. Fox, "Automatic generation of spoken dialogue from medical plans and ontologies,"  
513 (in eng), *Journal of biomedical informatics*, vol. 39, no. 5, pp. 482-99, Oct 2006, doi:  
514 10.1016/j.jbi.2005.12.008.
- 515 63 B. Mesko, G. Hetenyi, and Z. Gyorffy, "Will artificial intelligence solve the human resource crisis in  
516 healthcare?," (in eng), *BMC Health Serv Res*, vol. 18, no. 1, p. 545, Jul 13 2018, doi: 10.1186/s12913-018-  
517 3359-4.
- 518 64 S. i. Breastfeeding. "A virtual assistant to help doctors in their daily work."  
519 <https://www.safeinbreastfeeding.com/safedrugbot-chatbot-medical-assistant/> (accessed 10/27/2019,  
520 2019).
- 521 65 A. Gupta, H. Li, and R. Sharda, "Should I send this message? Understanding the impact of interruptions,  
522 social hierarchy and perceived task complexity on user performance and perceived workload," *Decis.*  
523 *Support Syst.*, vol. 55, no. 1, pp. 135-145, 2013, doi: 10.1016/j.dss.2012.12.035.
- 524 66 M. Czerwinski, E. Cutrell, and E. Horvitz, "Instant Messaging: Effects of Relevance and Timing," 11/20  
525 2000.
- 526 67 Qualtrics. "QualtricsXM." <https://www.qualtrics.com/> (accessed 11/2/2019, 2019).
- 527 68 E. Wiki. "Usability and user experience surveys."  
528 [http://edutechwiki.unige.ch/en/Usability\\_and\\_user\\_experience\\_surveys#UTAUT](http://edutechwiki.unige.ch/en/Usability_and_user_experience_surveys#UTAUT) (accessed 11/2/2019,  
529 2019).
- 530 69 Sudraben, L. X-ray.jpg, Ed., ed. wikimedia: Wikimedia, 2018.
- 531 70 O. A. Imaging, "Jane\_Doe\_CBCT\_NEW\_Report," Jane\_Doe\_CBCT\_NEW\_Report.jpg, Ed., ed.  
532 <http://www.orbitimaging.com/imaging-services/radiologist-interpretation/>.
- 533 71 "screen-0," screen-0.jpg, Ed., ed.
- 534 72 W. Hsu, "Capturing Data Elements and the Role of Imaging Informatics." [Online]. Available:  
535 <http://amos3.aapm.org/abstracts/pdf/99-27434-359478-111844-1383861762.pdf>
- 536 73 I. Zoom Video Communications. "Zoom." <https://zoom.us/> (accessed 8/22/2021, 2021).
- 537 74 Otter.AI. "Otter.AI." <https://otter.ai> (accessed 3/16/2021, 2021).
- 538 75 K. Krippendorff, *Content Analysis: An Introduction to Its Methodology*. Sage, 2004.
- 539 76 R. Likert, "A technique for the measurement of attitudes," *Archives of Psychology*, vol. 22 140, pp. 55-55,  
540 1932.
- 541 77 J. Willatt, S. Chong, J. A. Ruma, and J. Kuriakose, "Incidental Adrenal Nodules and Masses: The Imaging  
542 Approach," (in eng), *Int J Endocrinol*, vol. 2015, pp. 410185-410185, 2015, doi: 10.1155/2015/410185.  
543  
544

## 545 **Supporting Information Captions**

546 **S1 Appendix.** Detailed information on the study including the full survey, expanded hypothesis results, Semi-  
547 structured interview guide, code co-occurrence tables, full data analysis/findings, and additional diagrams.

548 **S2 Survey Data.** Raw quantitative survey data in Excel format.

549

## 550 **Figure Captions**

551 **Fig 3. Sample PACS workstation before/after IM based intervention, and details of intervention presented to survey takers. Source**  
552 **images for Lung X-Ray (69), Report (70), and IM transaction (71). LUNG-RAD scenario and output text (72).**

553 **Fig 2. Capture from Video 2 highlighting radiologist query and Radibot response**

554 **Fig 3. Final Path Model generated using SmartPLS v. 3.2.9 Bootstrapping**

555 **Fig 4. Partial Least Squares Path Model generated using SmartPLS v. 3.2.9 PLS**

556

After completing the draft report, you receive an IM notification. The notification's appearance is shown below as the orange highlight surrounding the IM tool on a PACS workstation. This conversation initiates two seconds after saving the draft report.

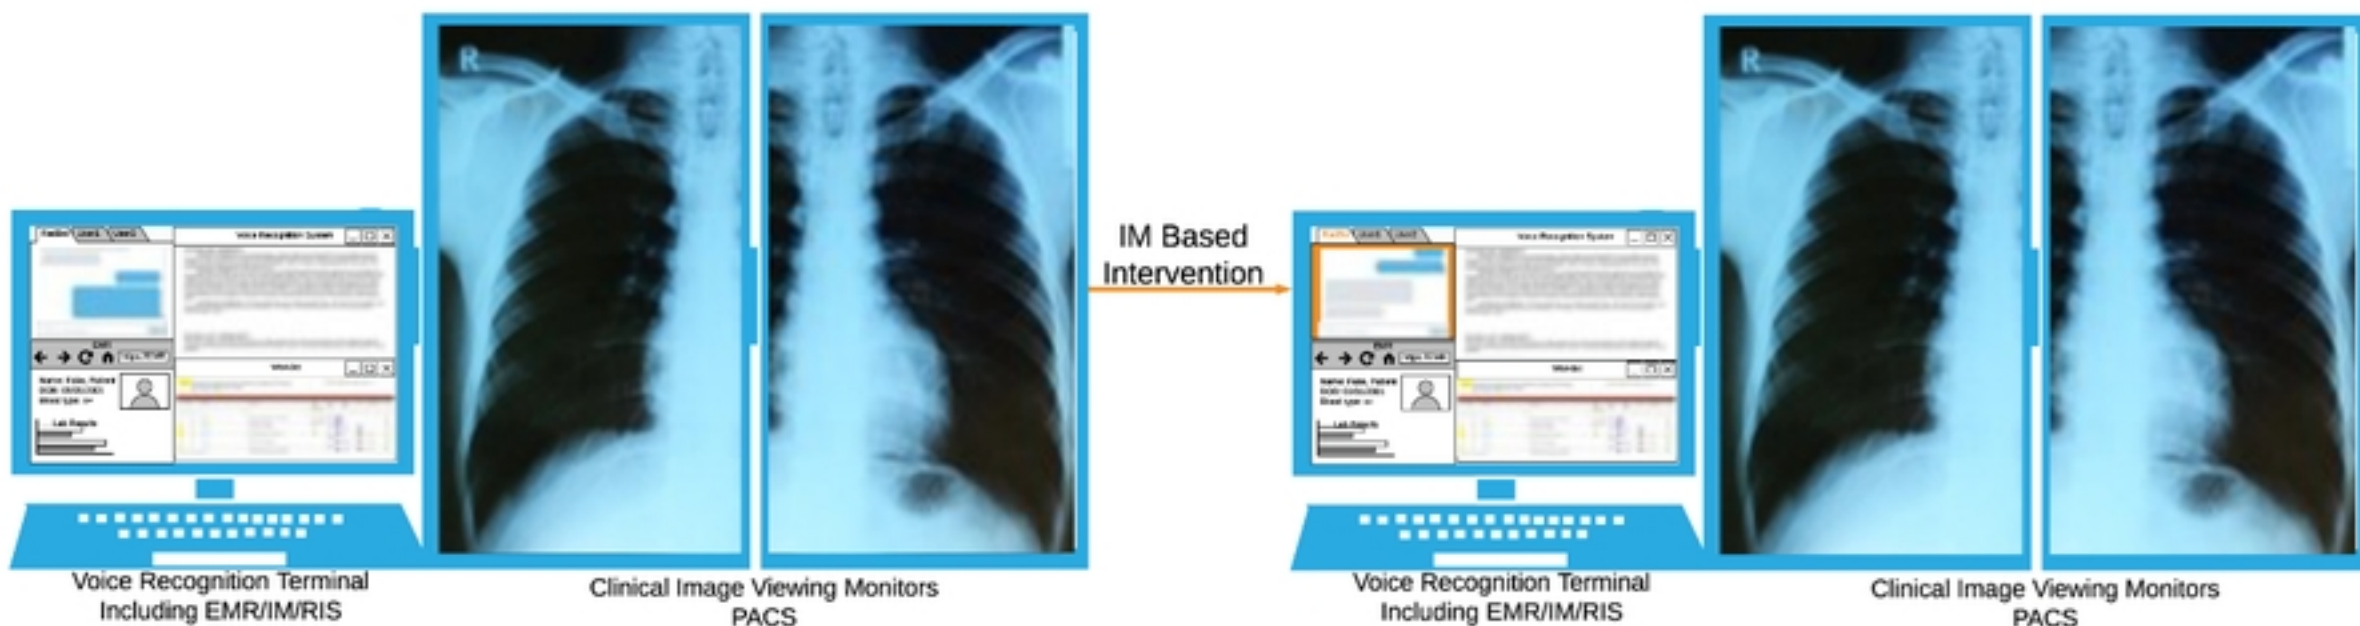

Text of the IM conversation follows. Message authors are indicated by **System** for automated messages and **Radiologist** for your response.

**System:** Based on your report text I am initiating the LUNG-RADS reporting tool. I have 2 recommended additions. Type 'Y' to add to the report and 'N' to move on.

**System:** Addition after TECHNIQUE, before FINDINGS sections:  
"RADIATION DOSE: 1 Volumetric series was performed for this exam.  
CTDIvol (CT dose Index-volume) = 2.5 mG  
DLP (Dose Length Product) = 80 mG cm"

**Radiologist:** Y

**System:** Addition in IMPRESSION:  
"Lung Cancer Screening: LungRADS Category 2, Benign appearing (non-actionable) nodule(s). These types of nodules are commonly observed and require no immediate action. Current recommendations for eligible high risk individuals (criteria below) are routine annual screening with low dose CT."

**Radiologist:** Y

**System:** Additions were added to the draft report and are now available for your review.

Figure 1

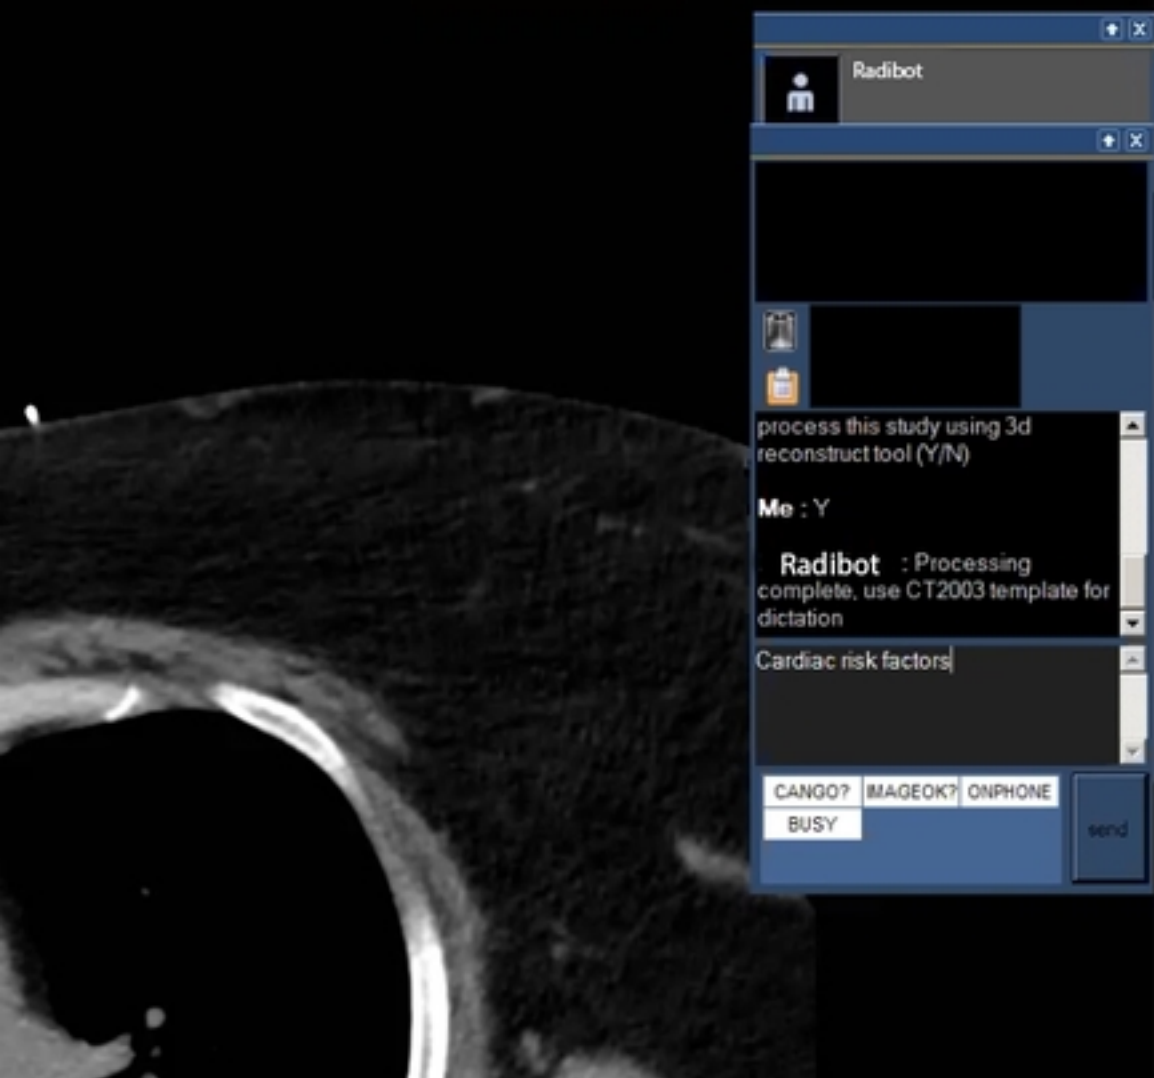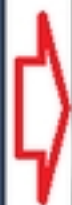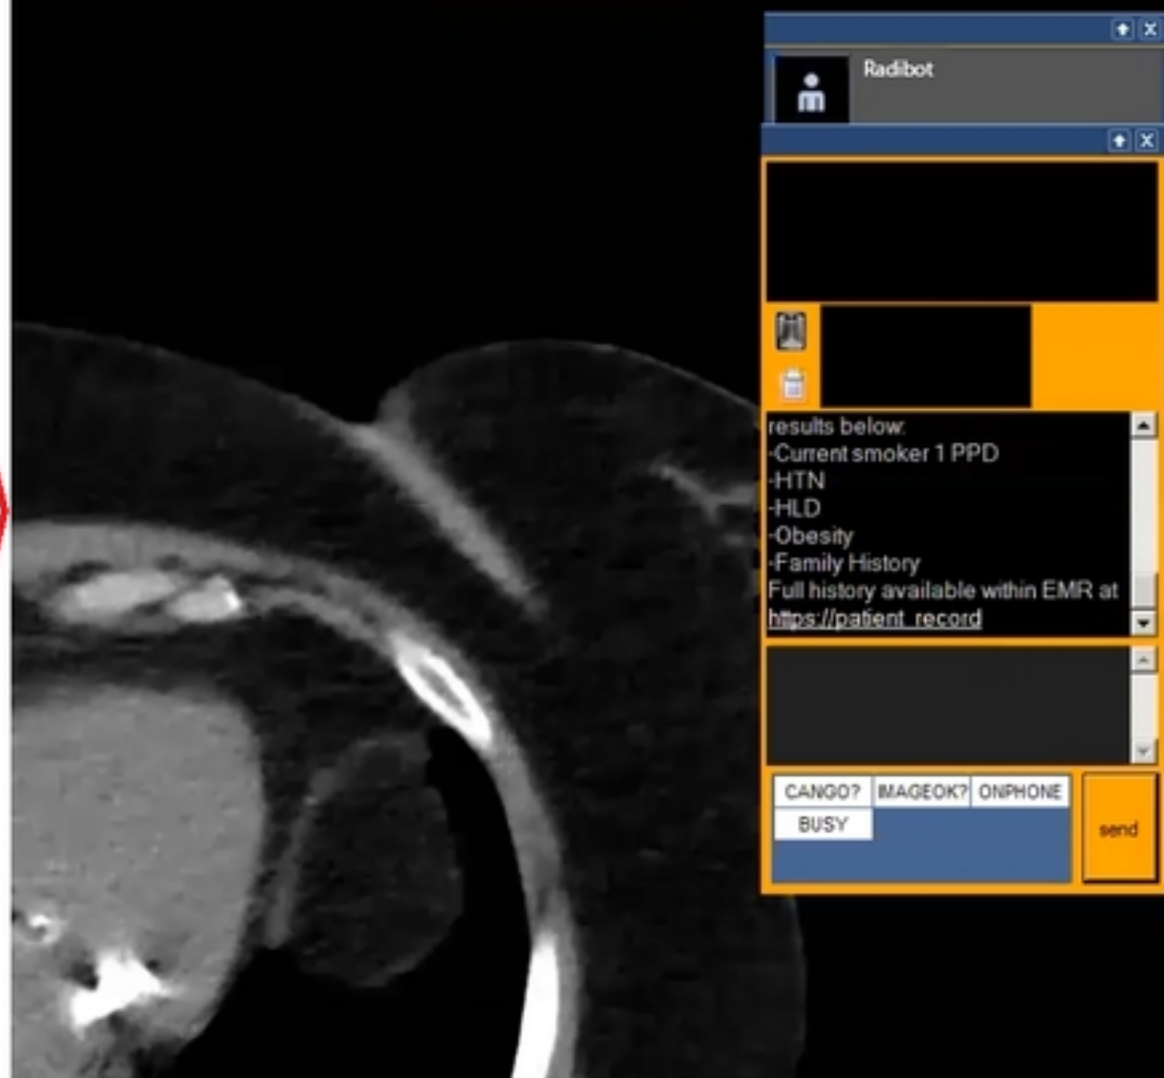

Figure 2

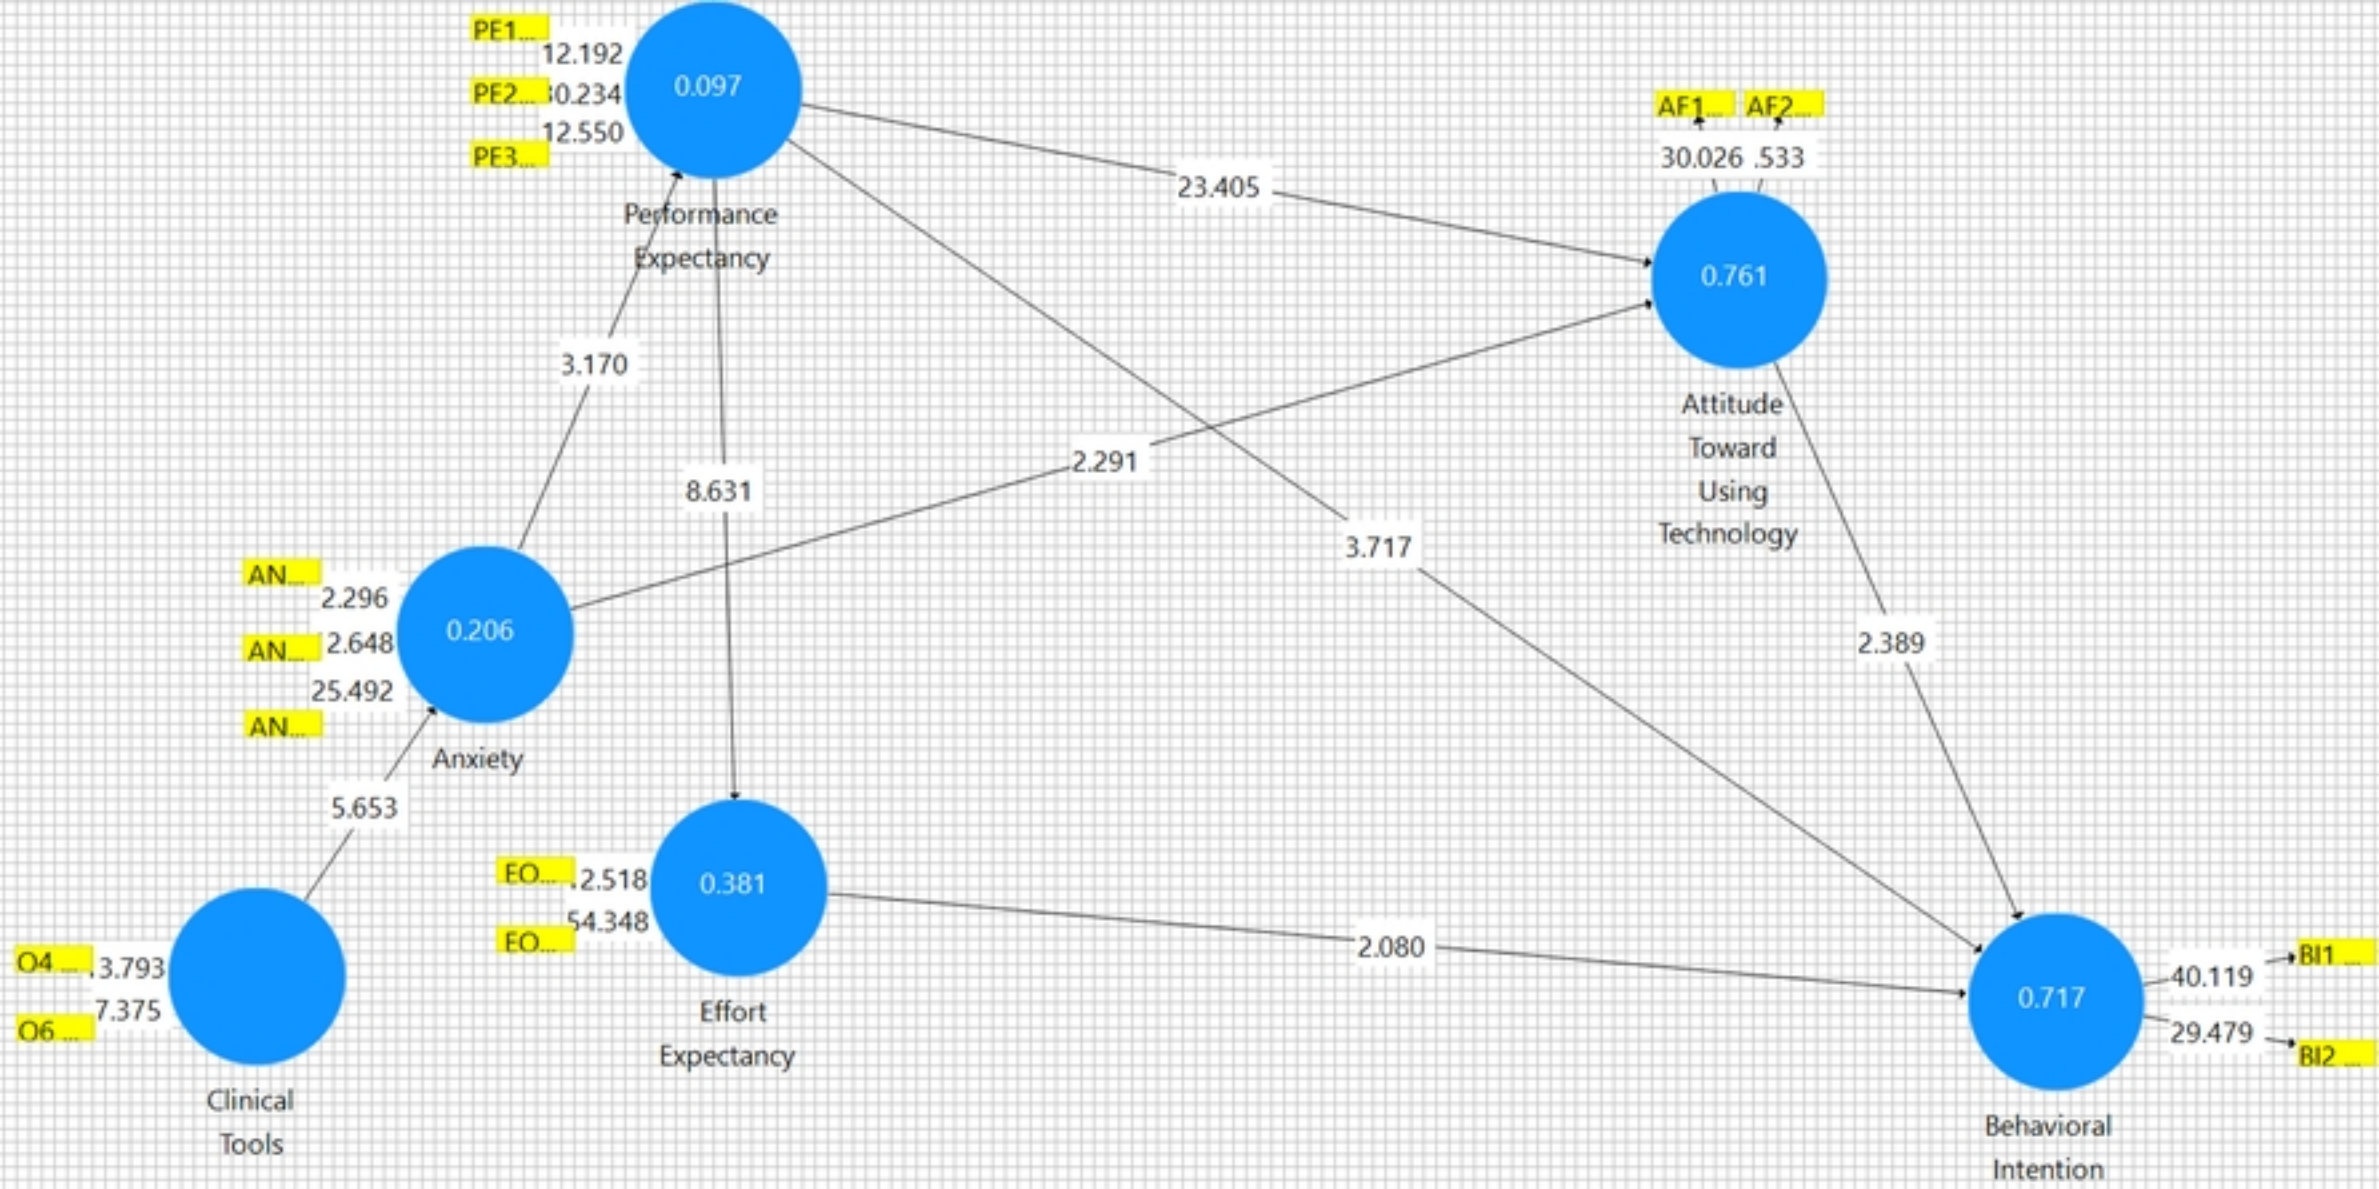

Figure 3

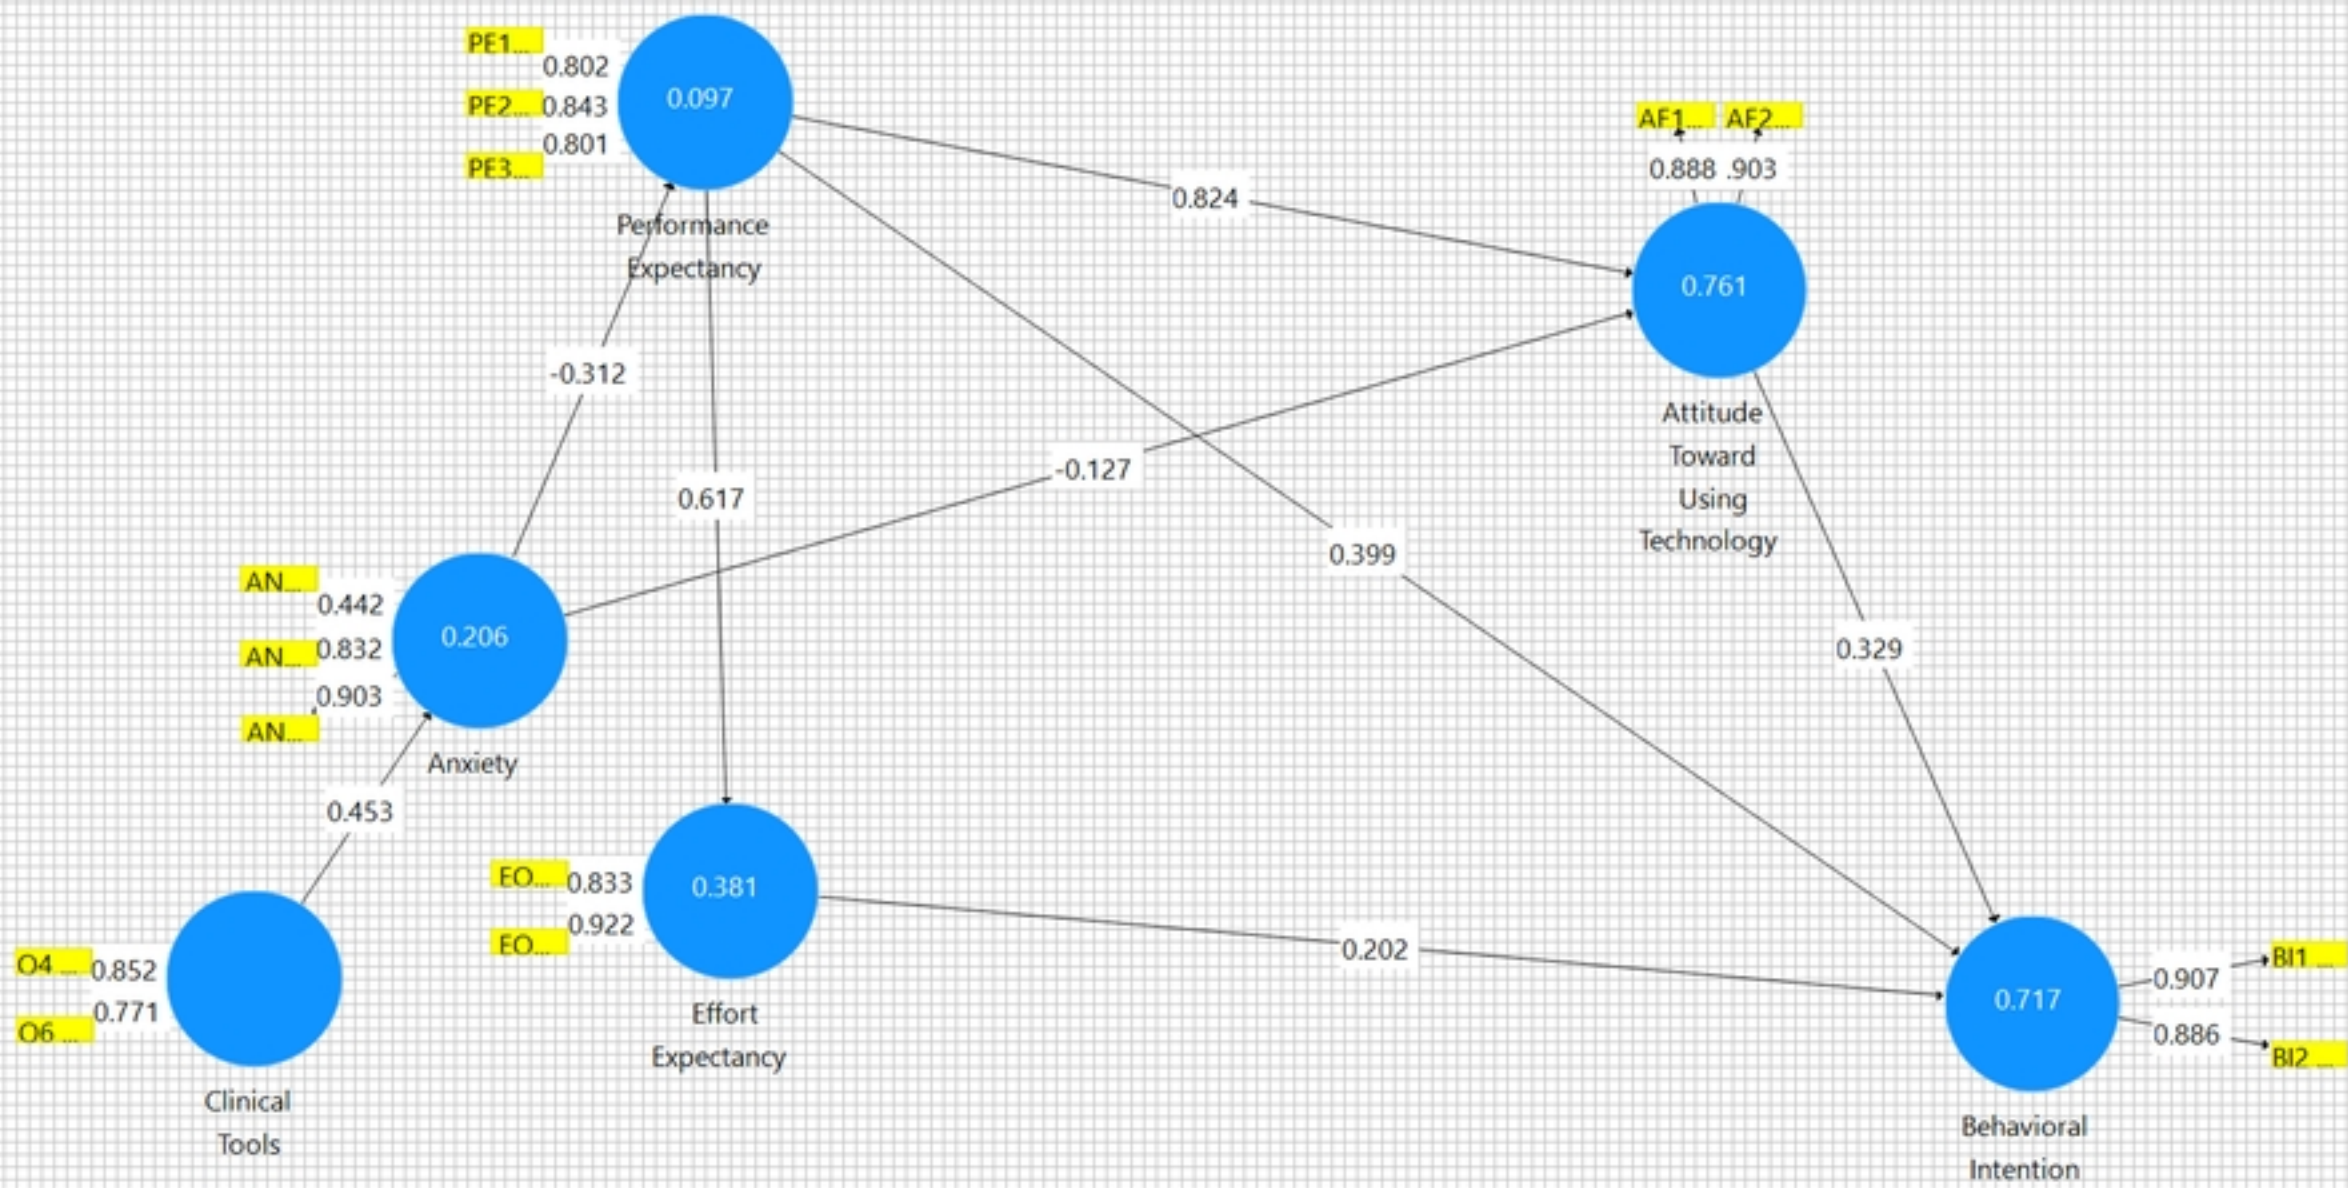

Figure 4
